# Supplementary material for: Design, synthesis and biological evaluation of novel amide-linked 18β-glycyrrhetinic acid derivatives as novel ALK inhibitors
Source: Royal Society of Chemistry journal article supplement (doi:10.1039/d0ra00681e), 2020-01-01

## Design, synthesis and biological evaluation of novel amide-linked 18 $\beta$ -glycyrrhetic acid derivatives as novel ALK inhibitors

Dong Cai,<sup>a</sup> Zhi hua Zhang,<sup>b</sup> Yu Chen,<sup>c</sup> Chao Ruan,<sup>d</sup> Sheng qiang Li,<sup>d</sup> Shi qin Chen<sup>d</sup> and Lian shan Chen<sup>\*d</sup>

---

<sup>a</sup> College of Public Basic Sciences, Jinzhou Medical University, Jinzhou, 121001, China.

<sup>b</sup> School of Chemical and Environmental Engineering, Liaoning University of Technology, Jinzhou, 121001, China.

<sup>c</sup> School of Life Science and Biopharmaceutics, Shenyang Pharmaceutical University, Shenyang, 110016, China.

<sup>d</sup> College of Pharmacy, Jinzhou Medical University, Jinzhou, 121001, China. E-mail: 509205162@QQ.com

### Table of Contents

|                                                                                     |       |
|-------------------------------------------------------------------------------------|-------|
| <sup>1</sup> H and <sup>13</sup> C NMR and HRMS of compound ( <b>2</b> ) .....      | S2    |
| <sup>1</sup> H and <sup>13</sup> C NMR and HRMS of compound ( <b>3</b> ) .....      | S3    |
| <sup>1</sup> H and <sup>13</sup> C NMR and HRMS of compounds ( <b>4a-4y</b> ) ..... | S4-28 |
| HRMS of compounds ( <b>5</b> and <b>7</b> ) .....                                   | S29   |

Tert-butyl 4-(36-hydroxy-11-oxo-18 $\beta$ -olean-12-en-30-carbonyl)piperazine-1-carboxylate (2)

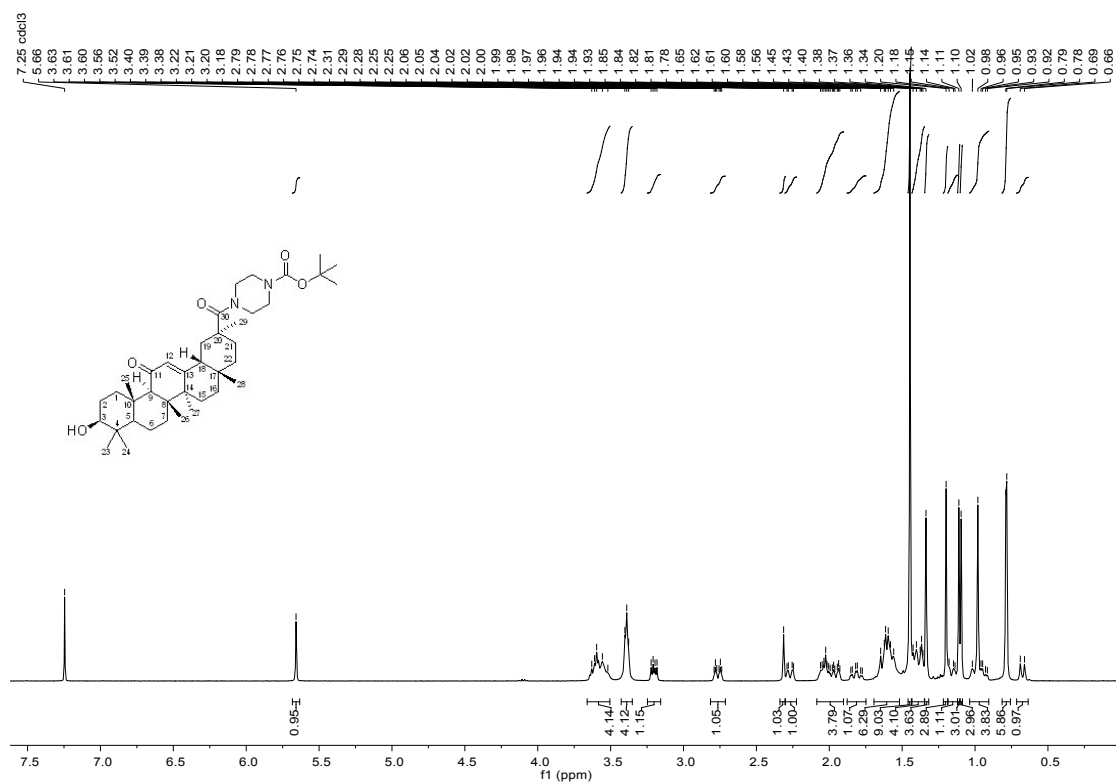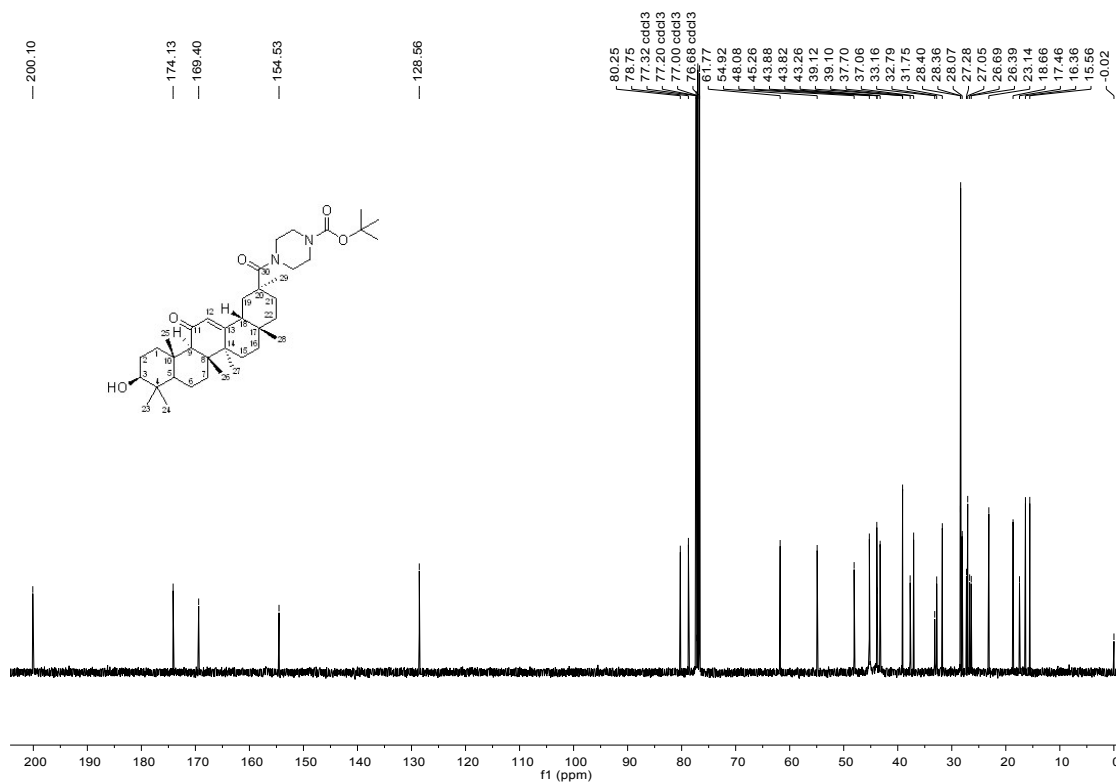

3 $\beta$ -hydroxyl-11-oxo-18 $\beta$ -olean-12-en-30- carbonyl piperazine (3)

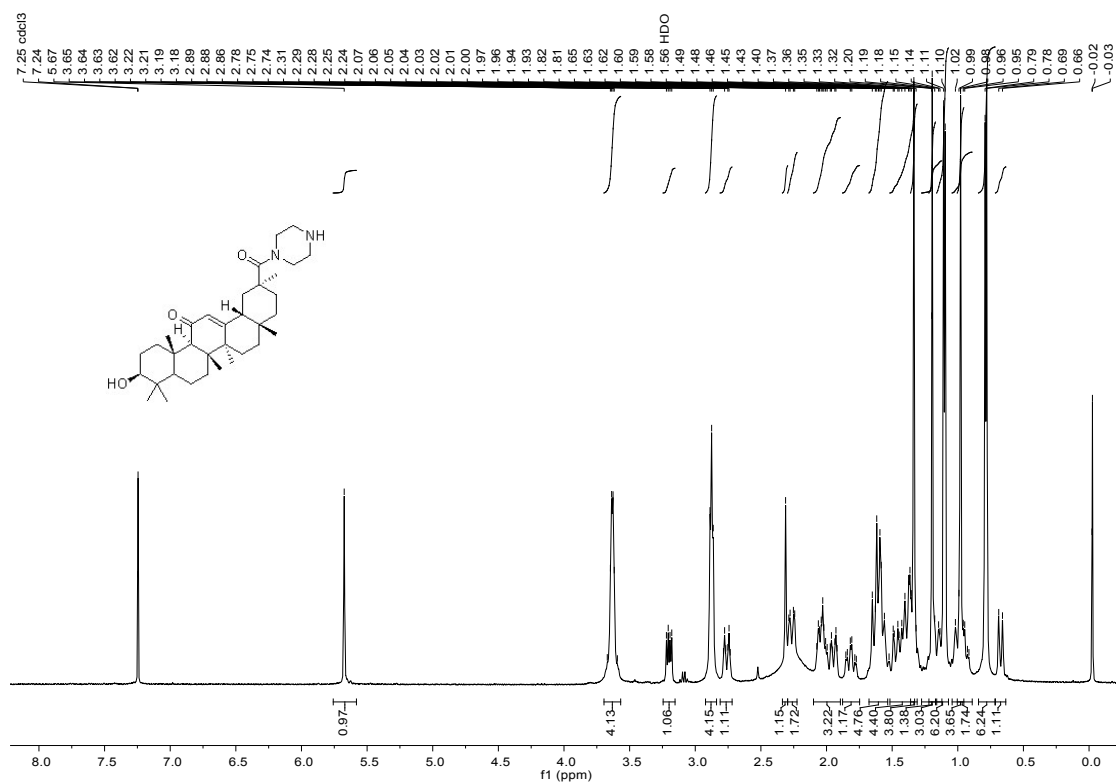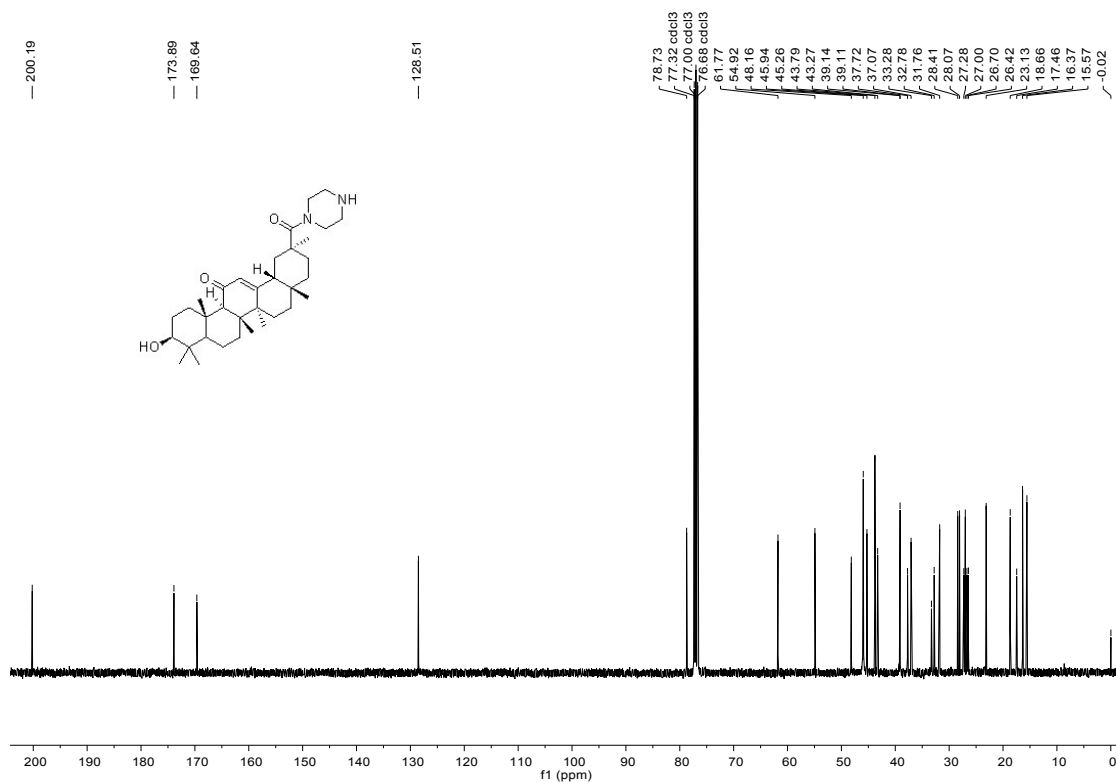

3 $\beta$ -Hydroxy-30-(4-(3,4-dimethoxybenzoyl)-1-piperazinyl)-olean-12-ene-11,30-dione (**4a**)

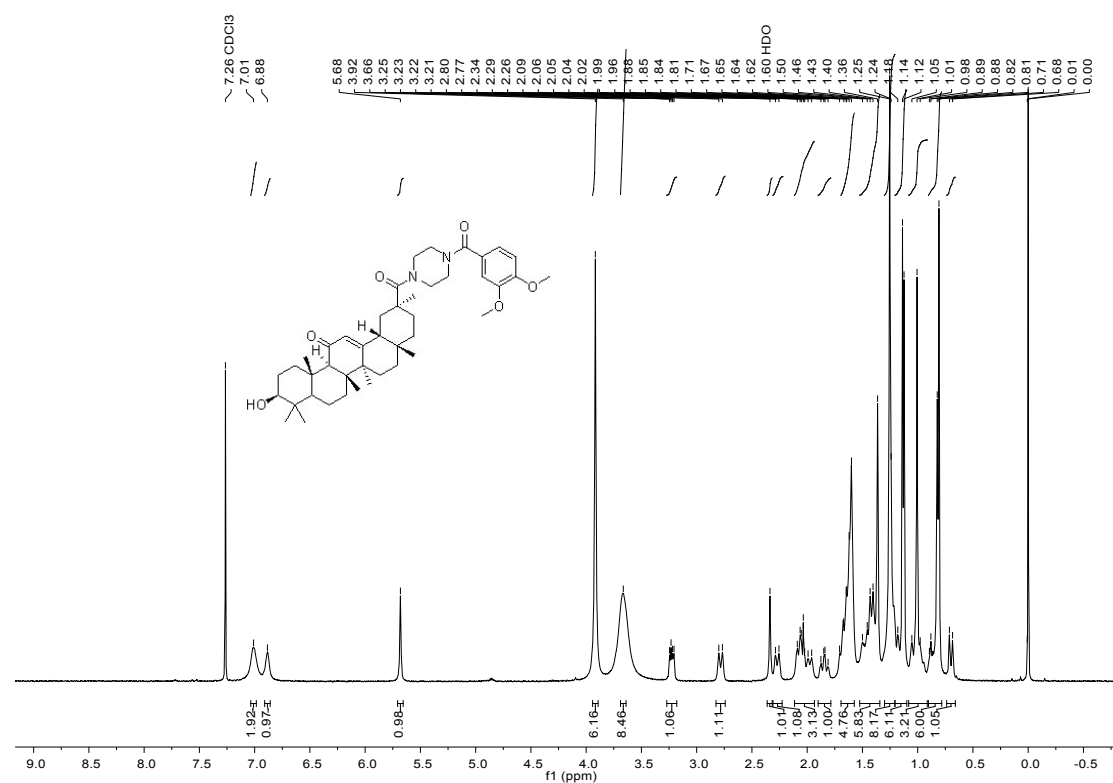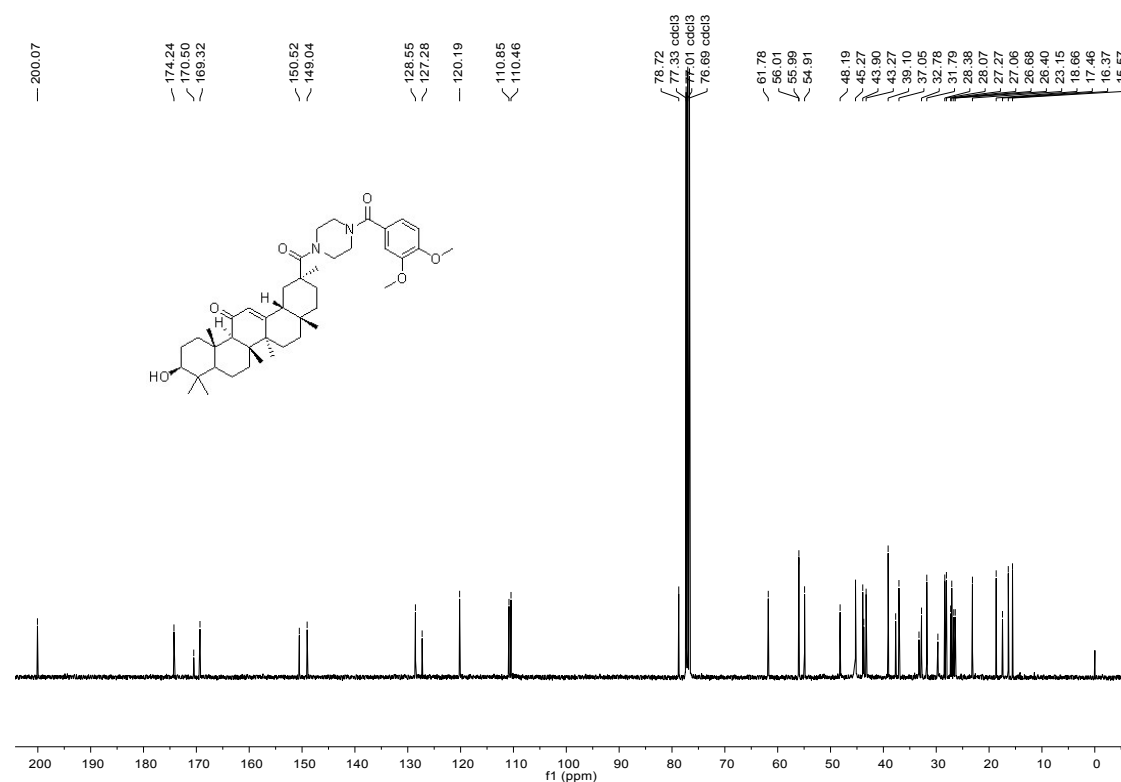

3 $\beta$ -Hydroxy-30-(4-(3,5-dimethoxybenzoyl)-1-piperazinyl)-olean-12-ene-11,30-dione (4b)

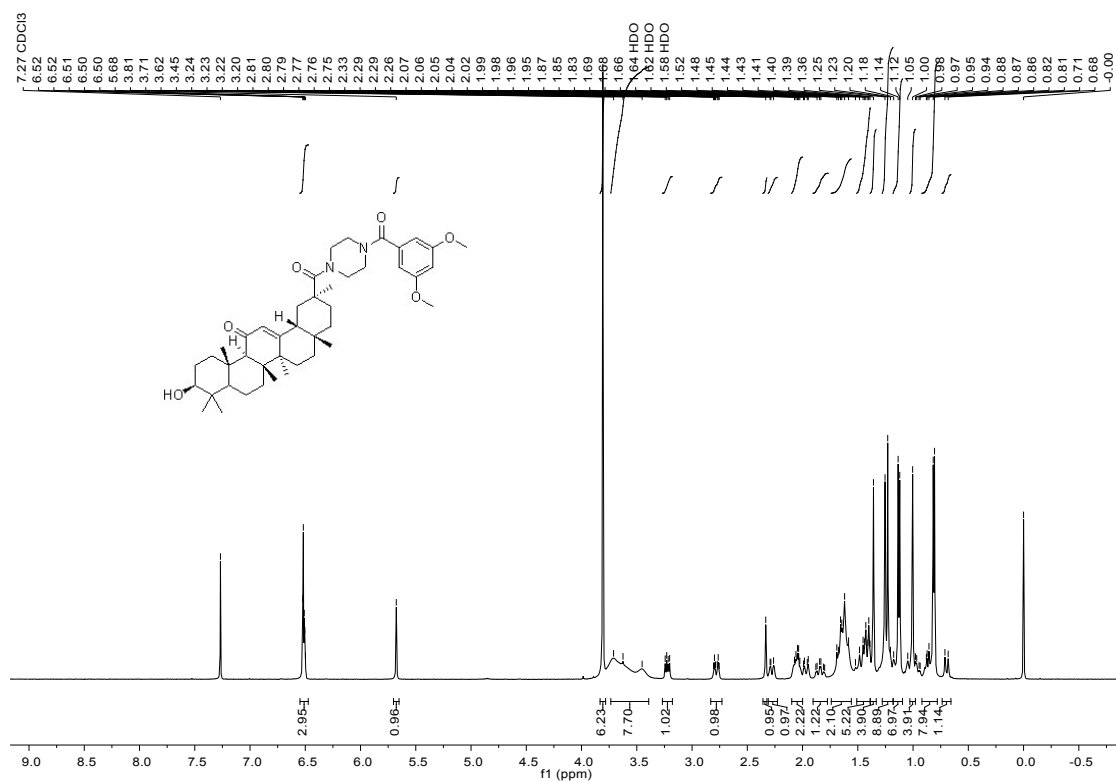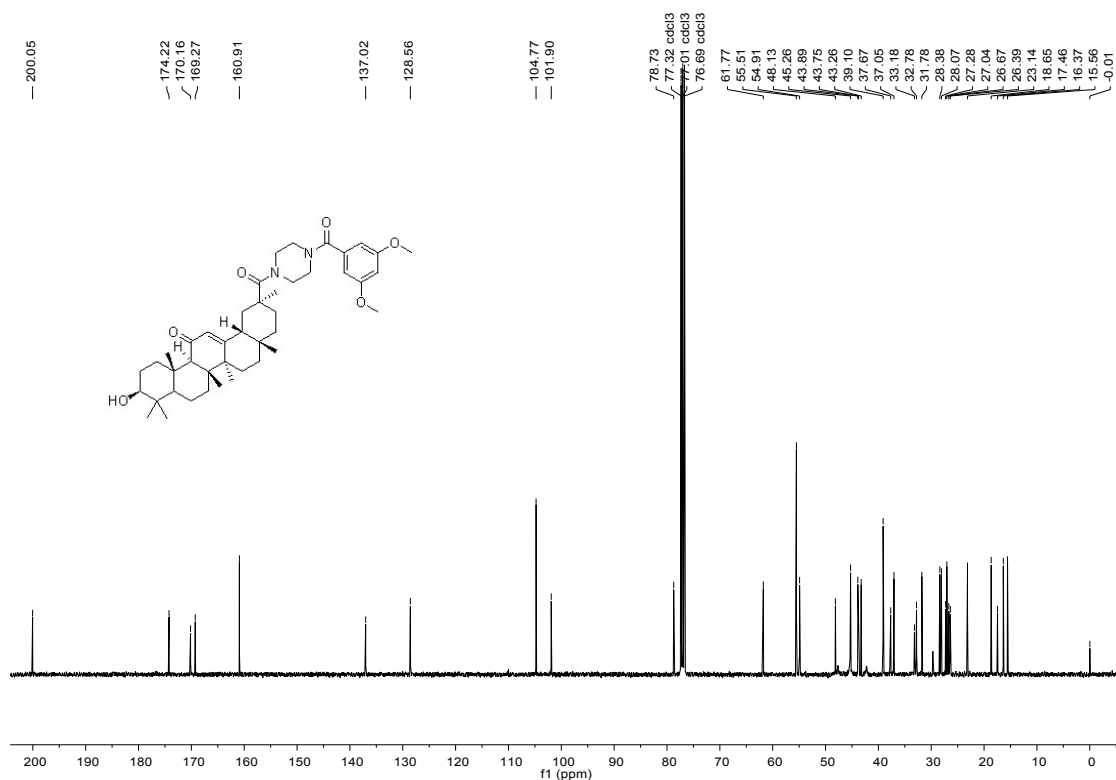

3 $\beta$ -Hydroxy-30-(4-(3,5-dimethylbenzoyl)-1-piperazinyl)-olean-12-ene-11,30-dione (**4c**)

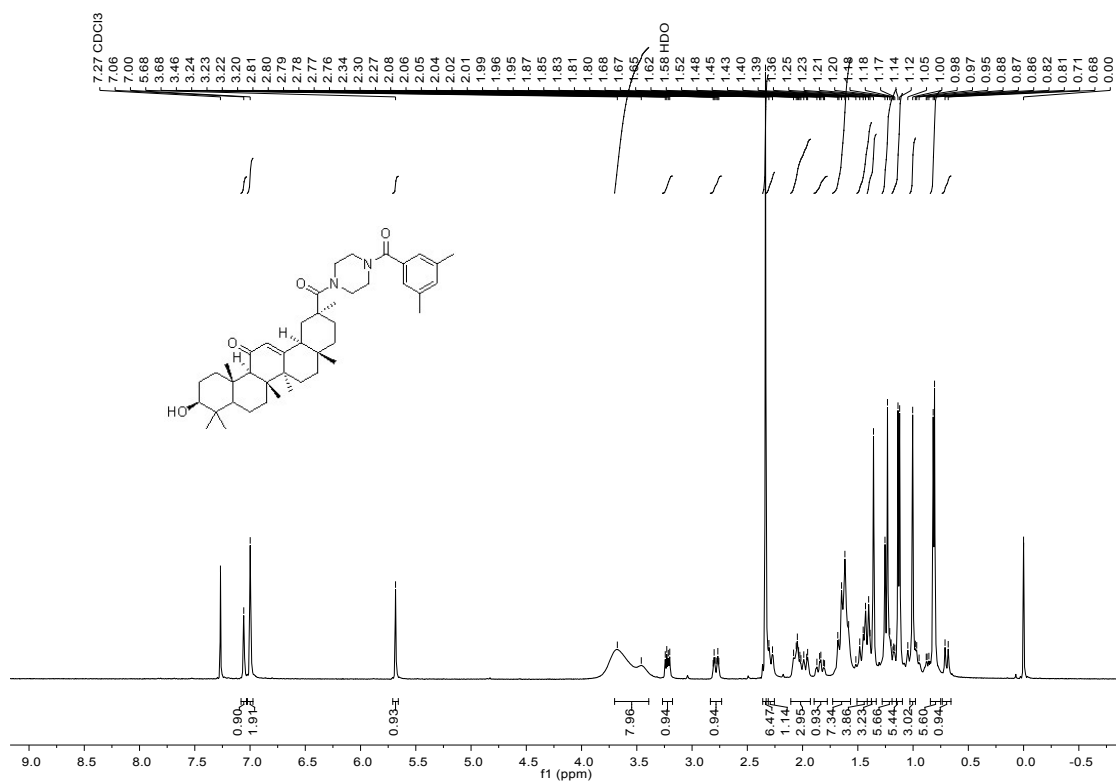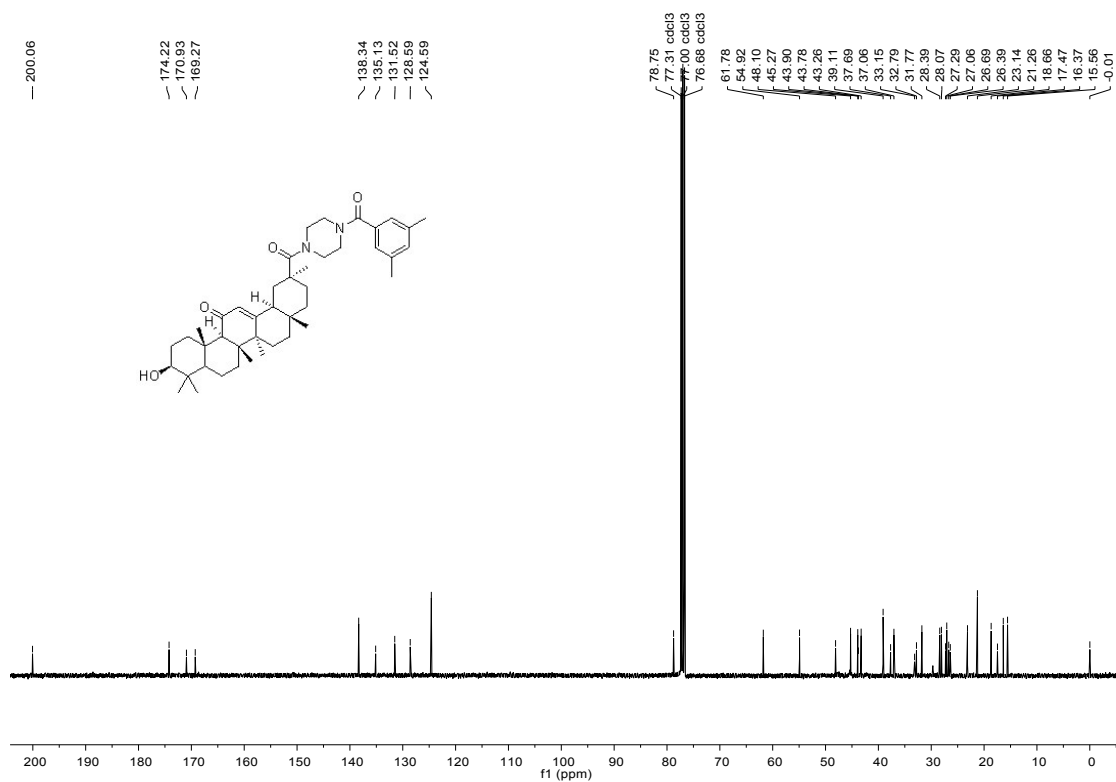

3 $\beta$ -Hydroxy-30-(4-(3-methylbenzoyl)-1-piperazinyl)-olean-12-ene-11,30-dione (**4d**)

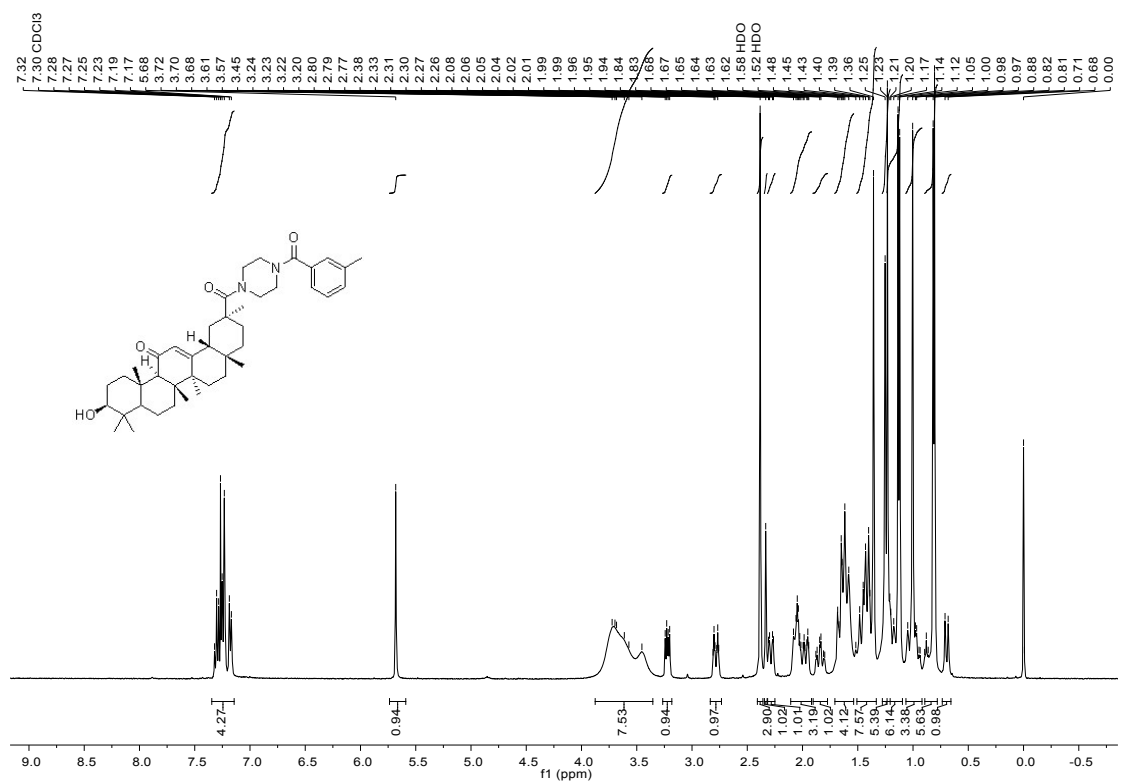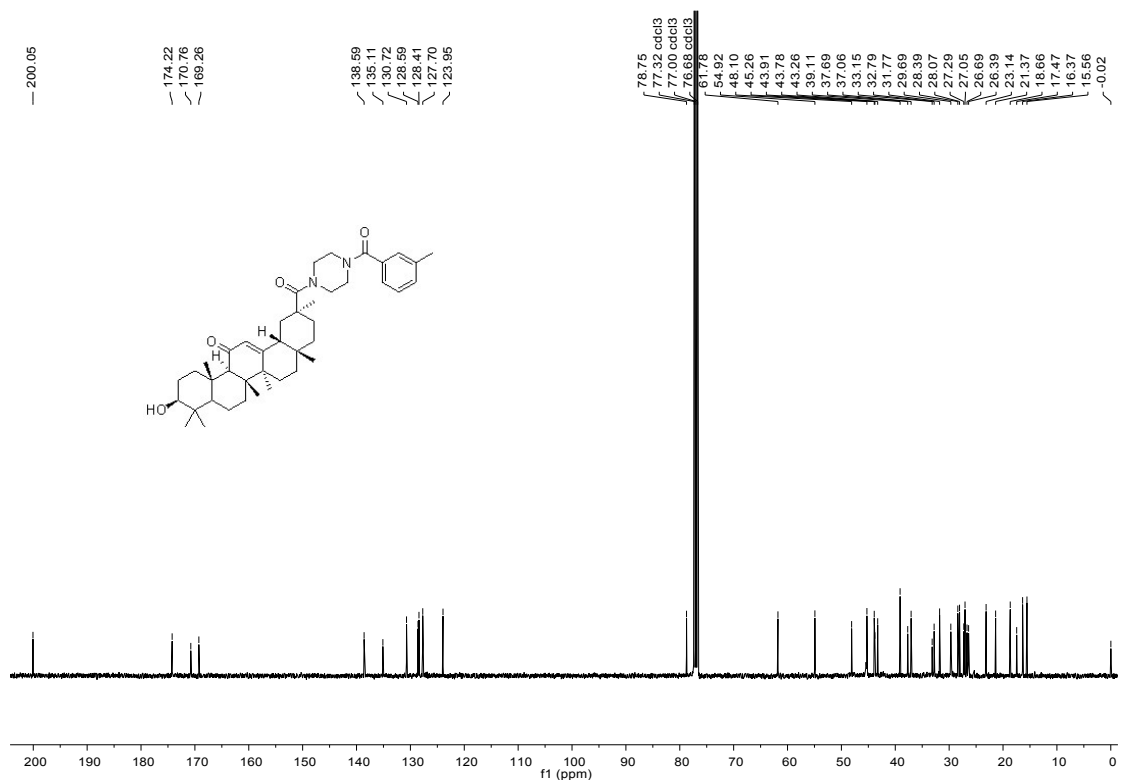

3 $\beta$ -Hydroxy-30-(4-(3,4-dichlorobenzoyl)-1-piperazinyl)-olean-12-ene-11,30-dione (**4e**)

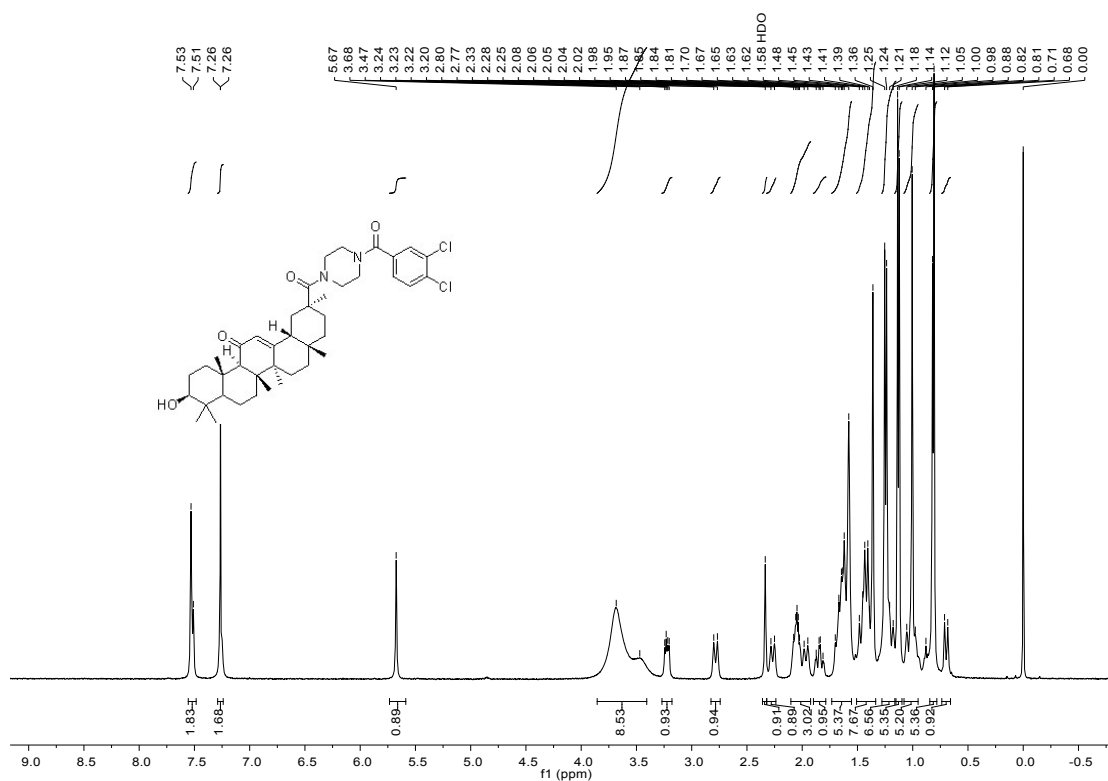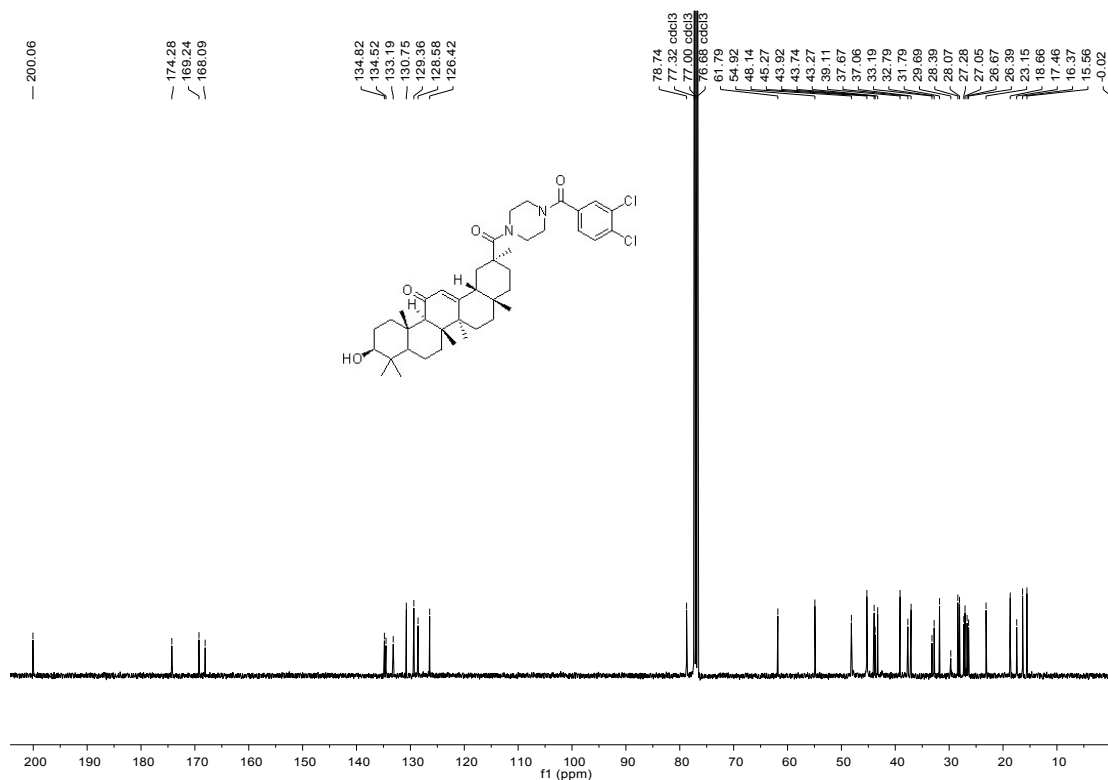



3 $\beta$ -Hydroxy-30-(4-(2,4-dichlorobenzoyl)-1-piperazinyl)-olean-12-ene-11,30-dione (**4f**)

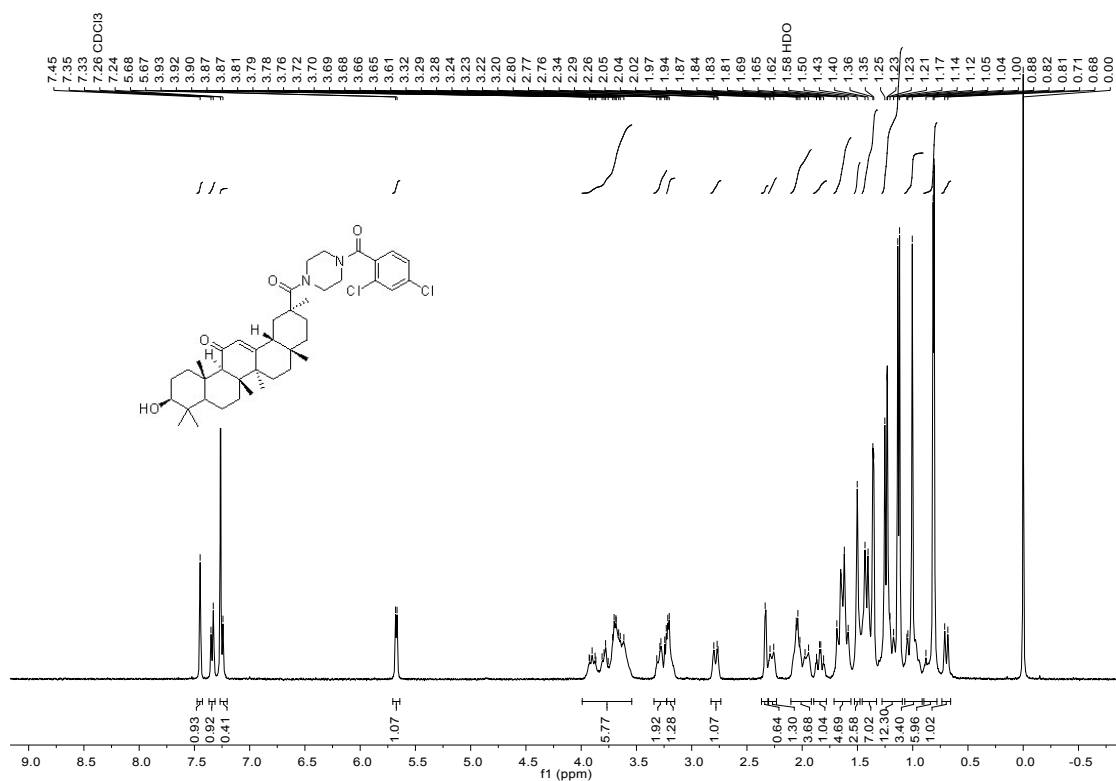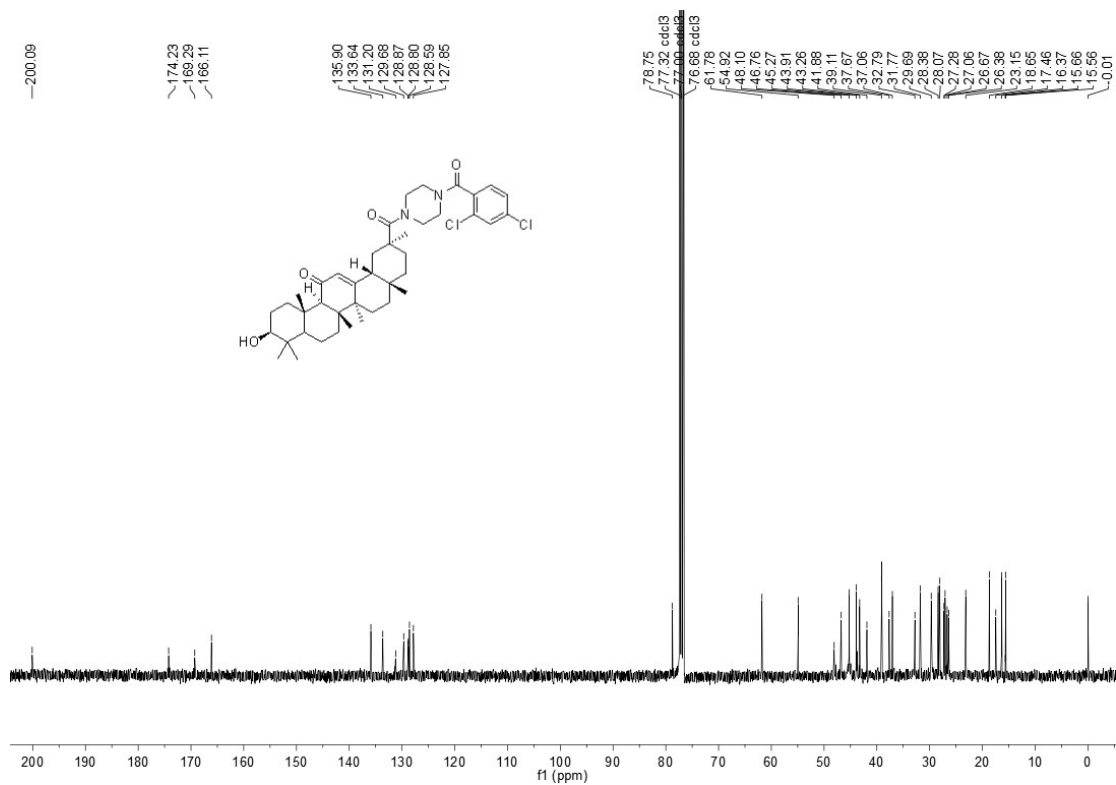

3 $\beta$ -Hydroxy-30-(4-(3,5-dichlorobenzoyl)-1-piperazinyl)-olean-12-ene-11,30-dione (**4g**)

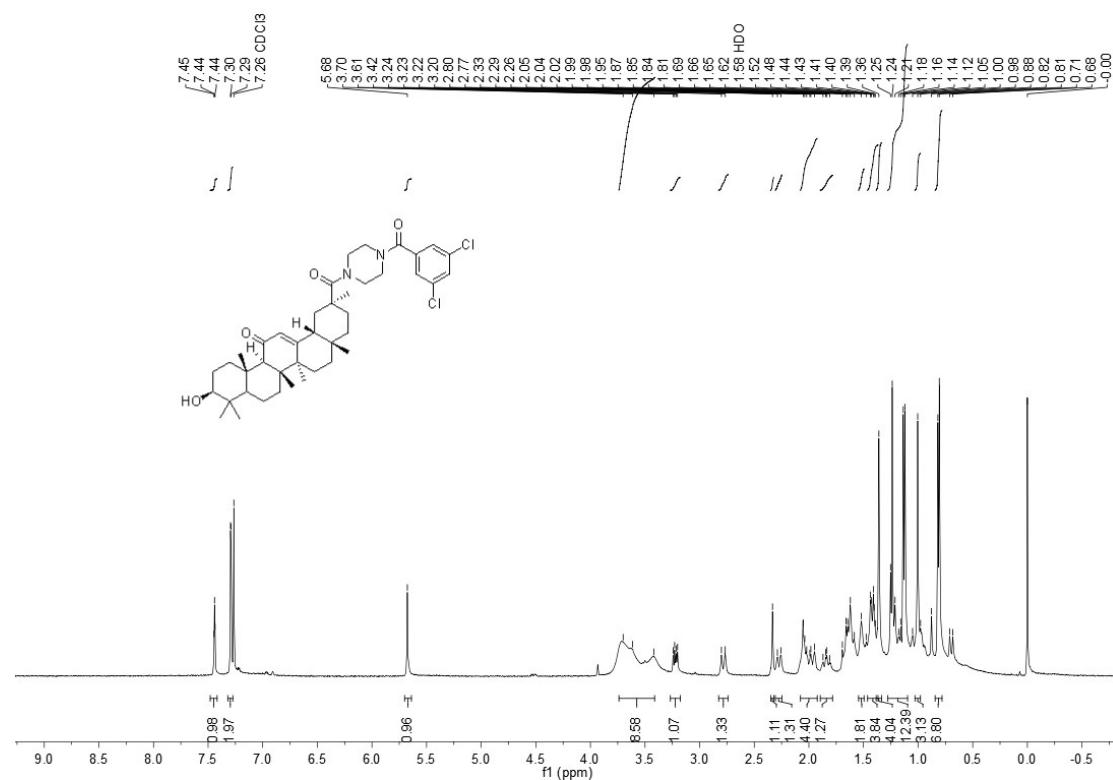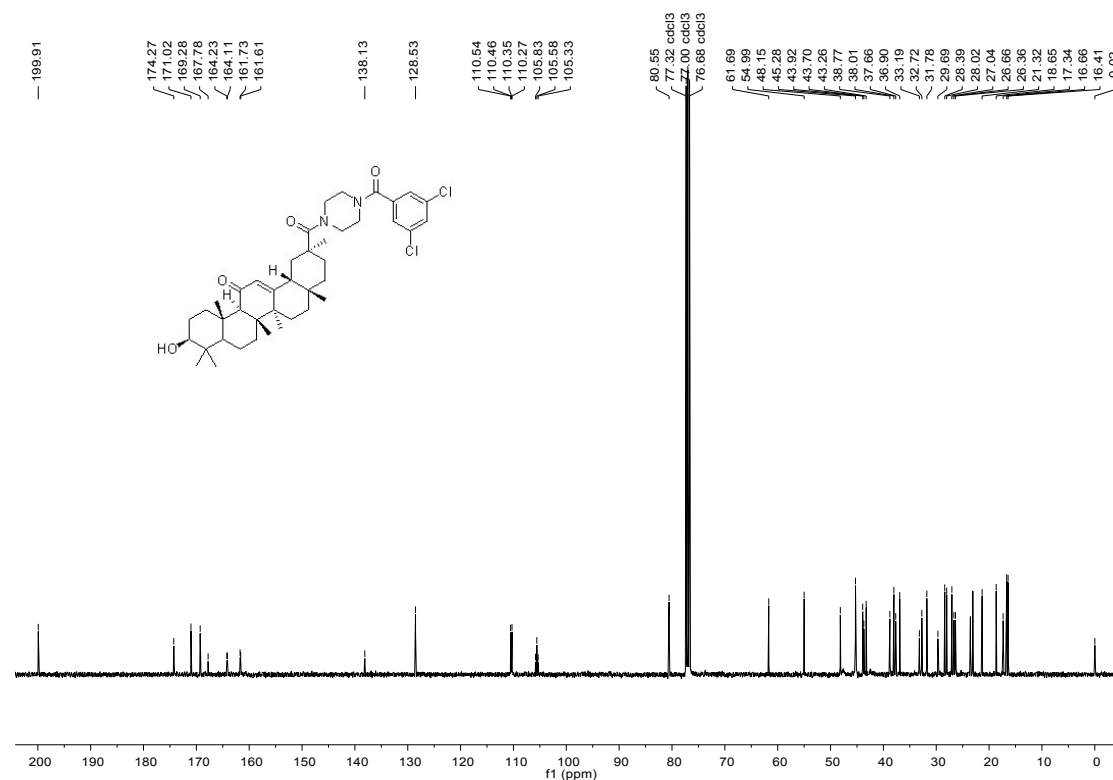

3 $\beta$ -Hydroxy-30-(4-(3-chlorobenzoyl)-1-piperazinyl)-olean-12-ene-11,30-dione (**4h**)

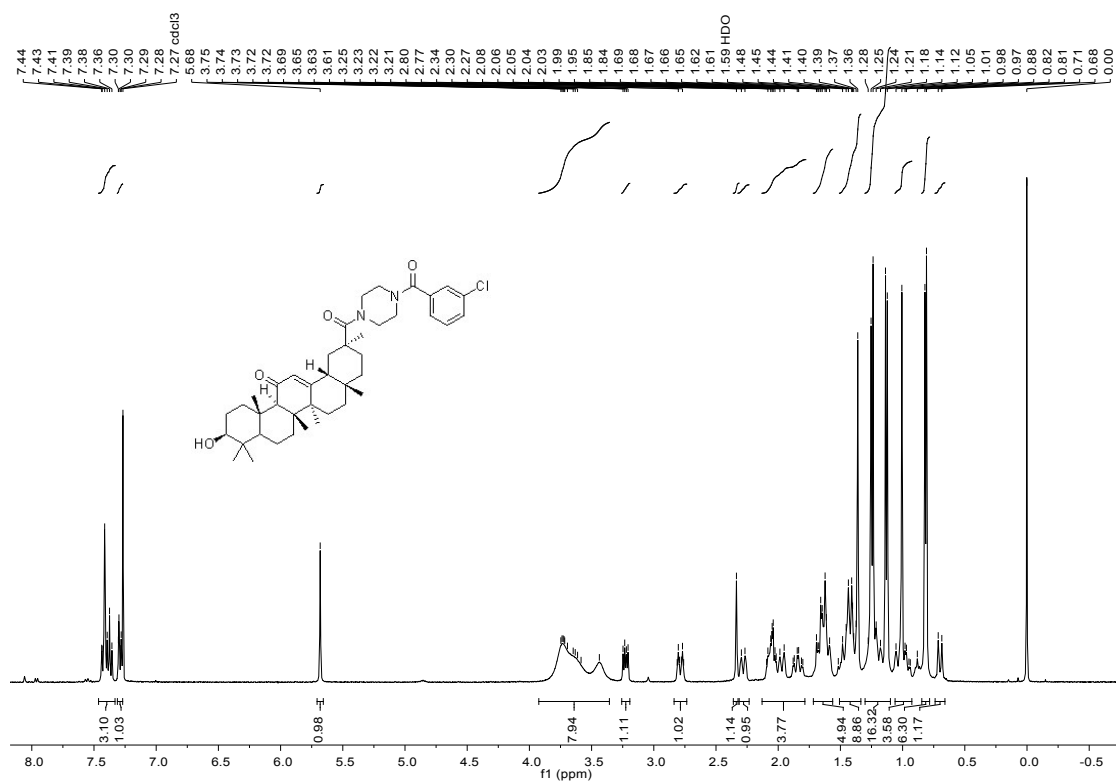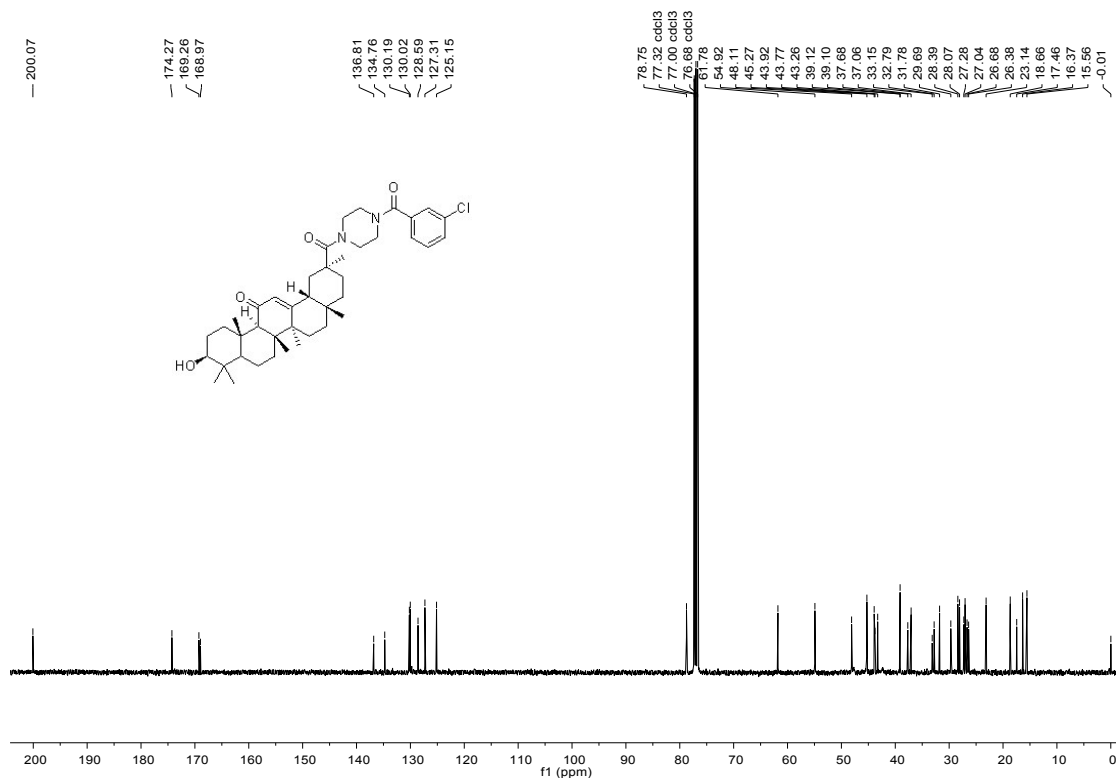

3 $\beta$ -Hydroxy-30-(4-(4-chlorobenzoyl)-1-piperazinyl)-olean-12-ene-11,30-dione (**4i**)

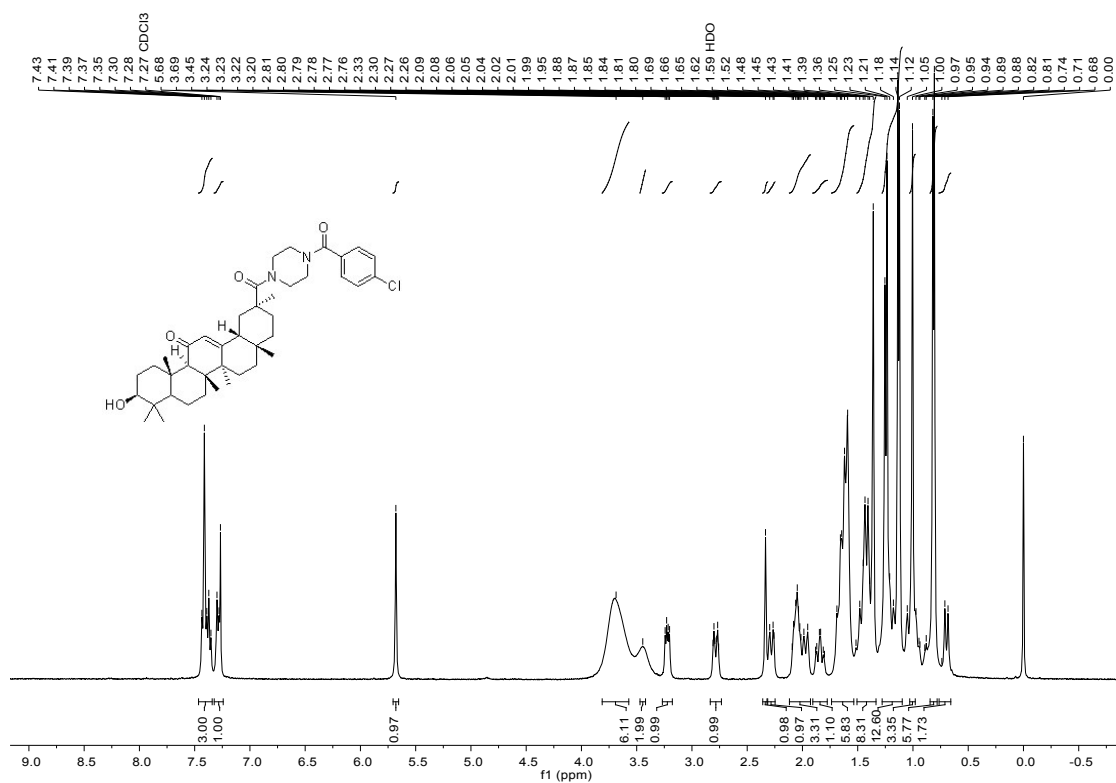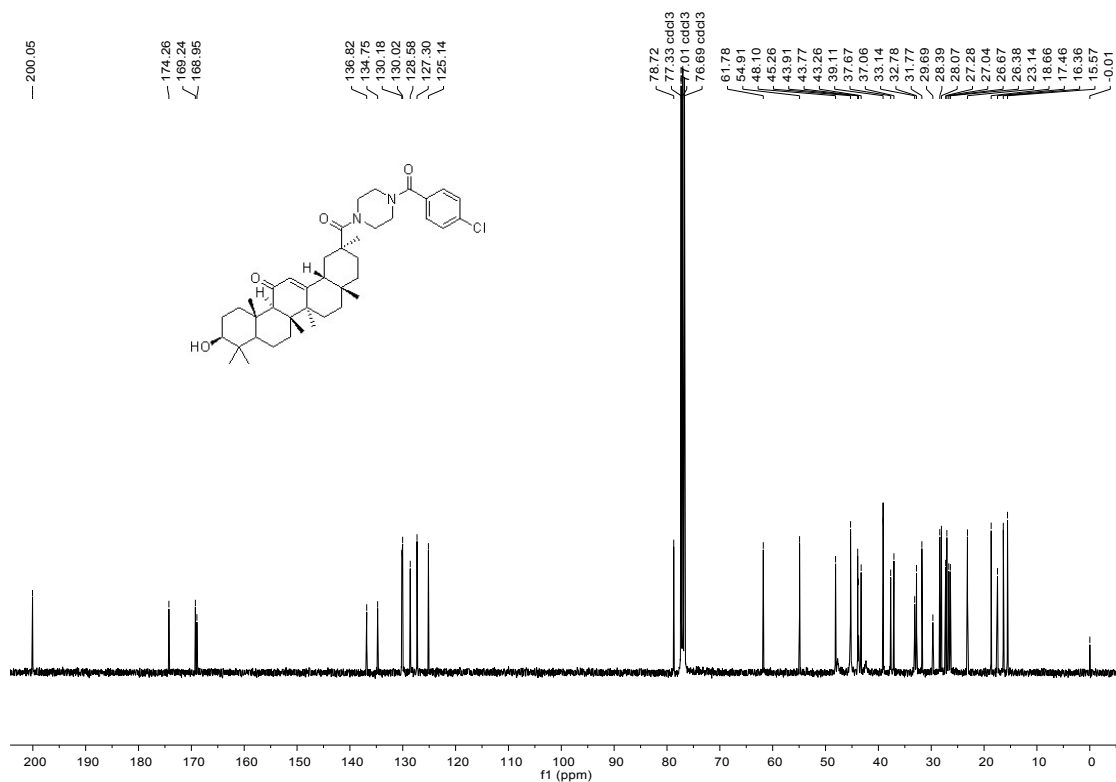

3 $\beta$ -Hydroxy-30-(4-(3-bromobenzoyl)-1-piperazinyl)-olean-12-ene-11,30-dione (**4j**)

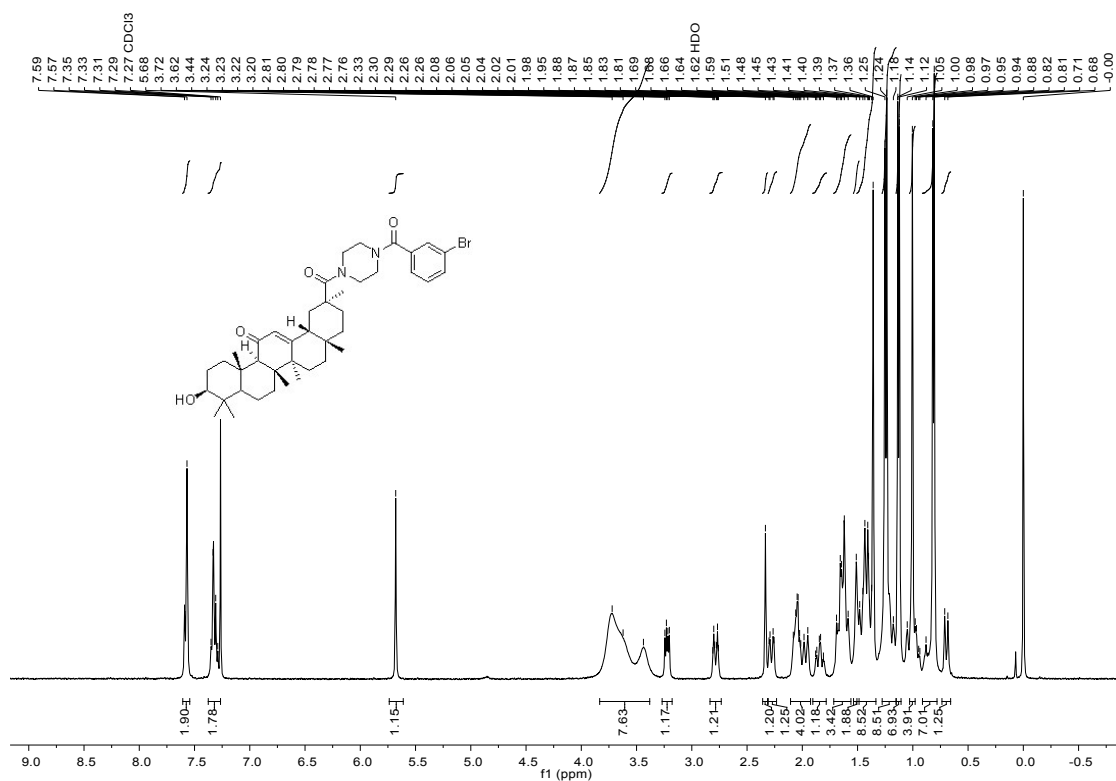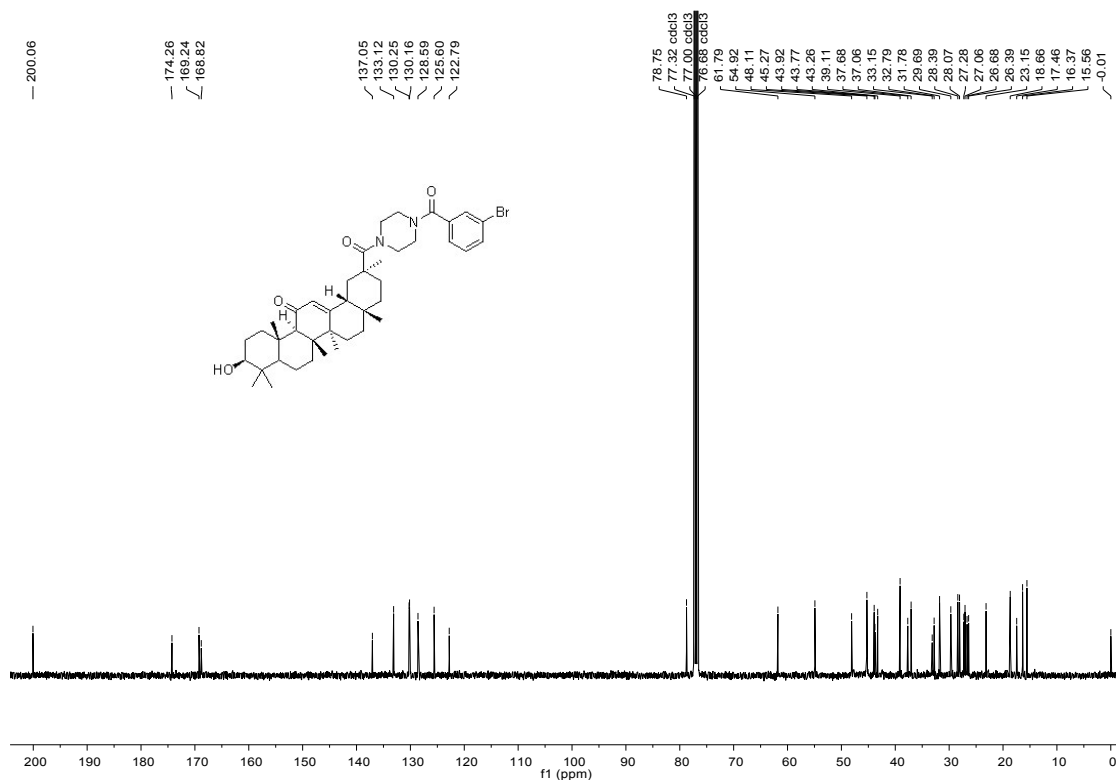

3 $\beta$ -Hydroxy-30-(4-(4-bromobenzoyl)-1-piperazinyl)-olean-12-ene-11,30-dione (**4k**)

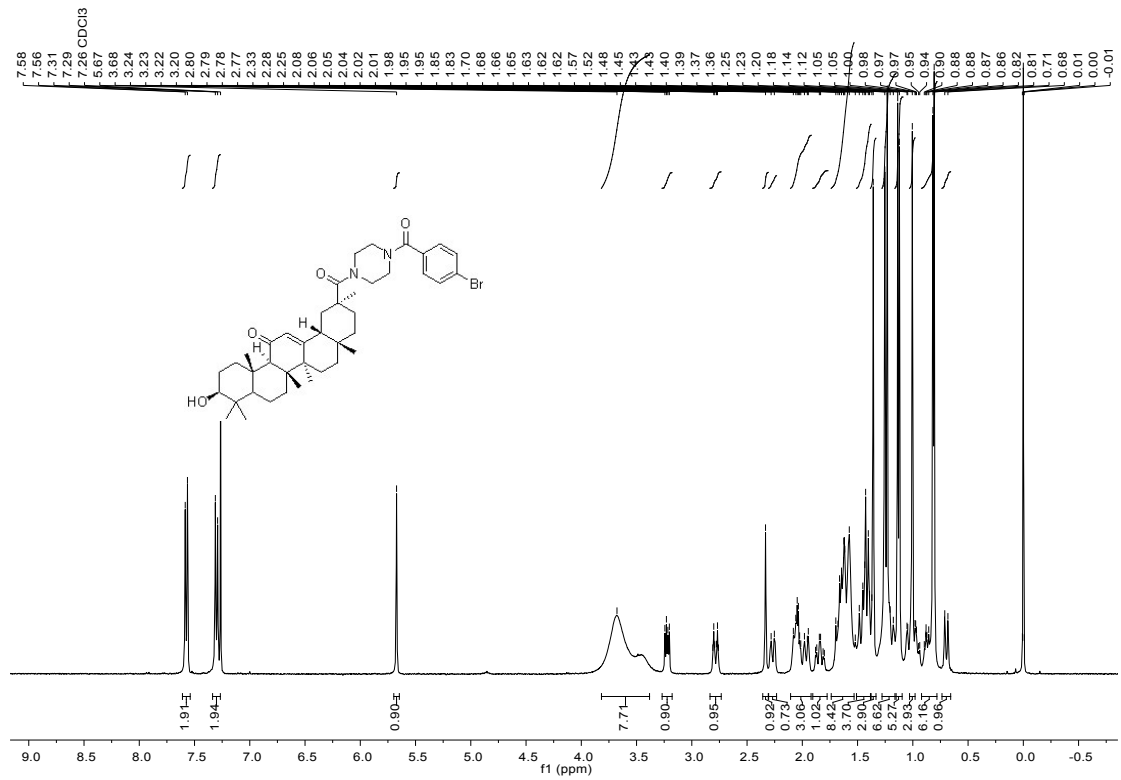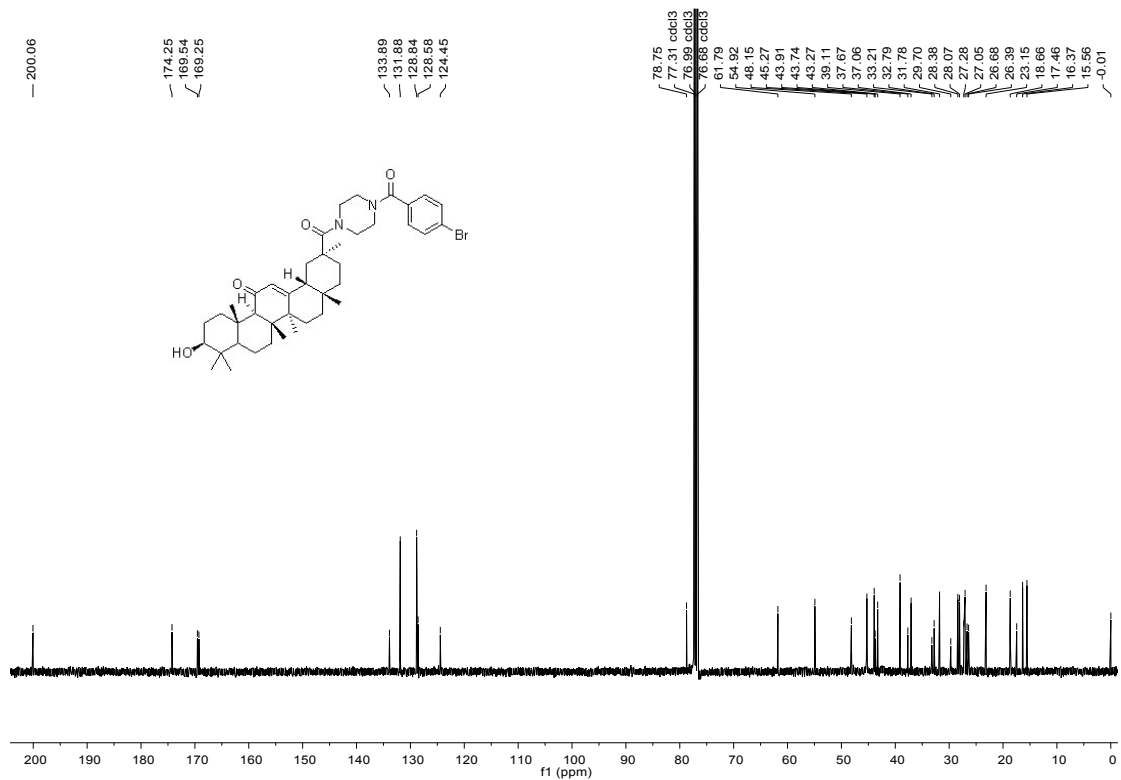

3 $\beta$ -Hydroxy-30-(4-(3-fluorobenzoyl)-1-piperazinyl)-olean-12-ene-11,30-dione (**4I**)

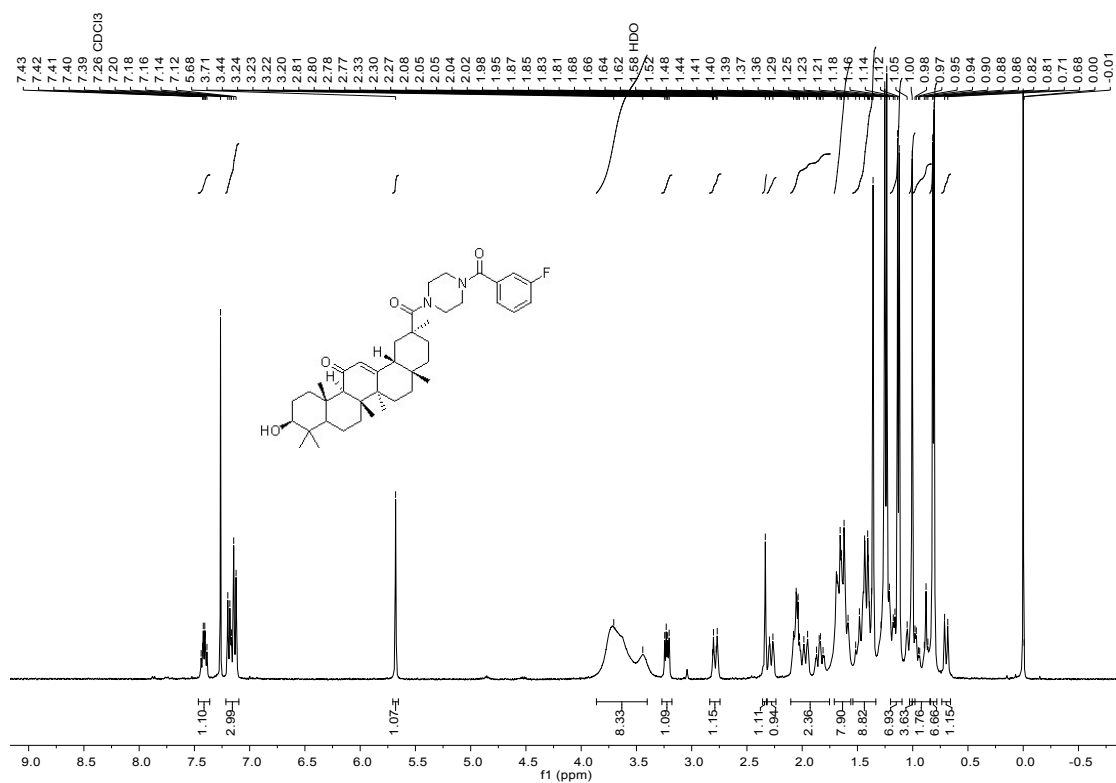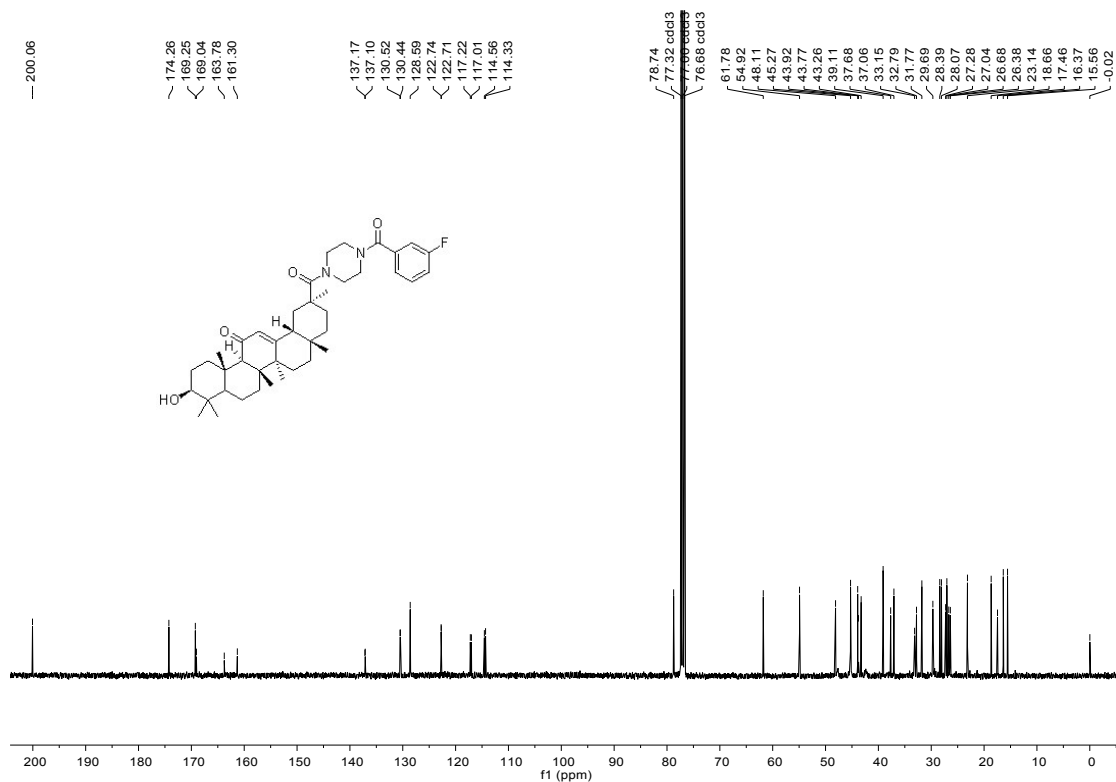

3 $\beta$ -Hydroxy-30-(4-(2,4-difluorobenzoyl)-1-piperazinyl)-olean-12-ene-11,30-dione (**4m**)

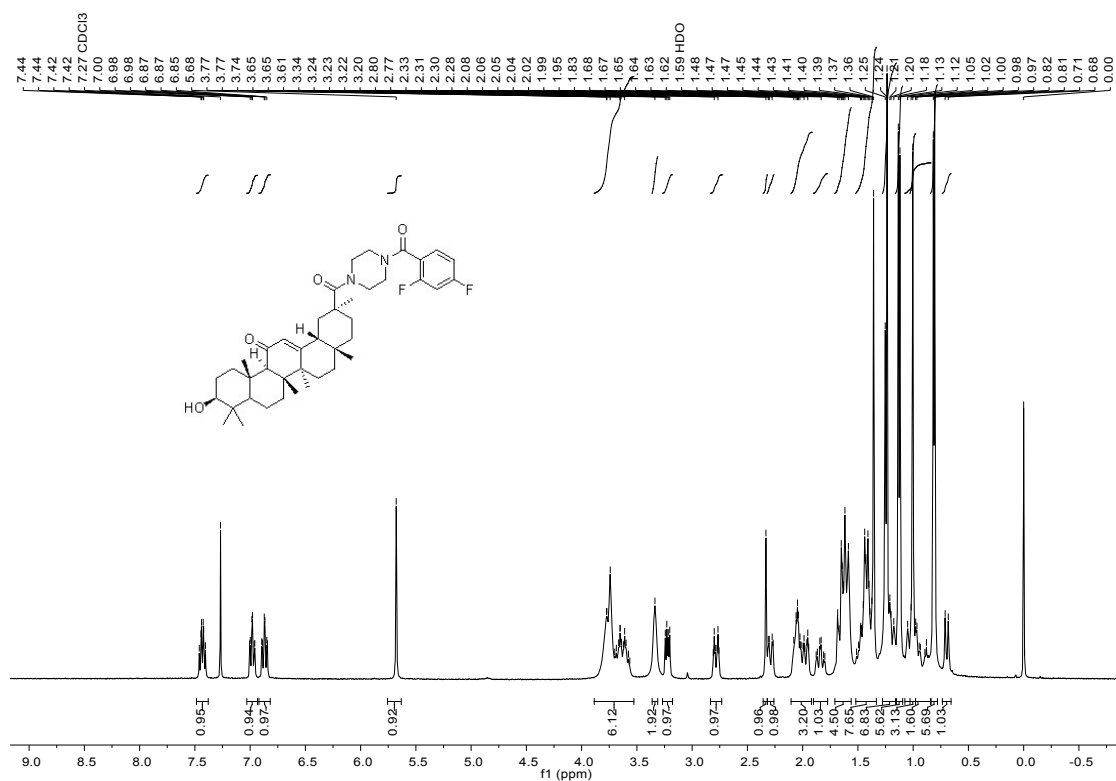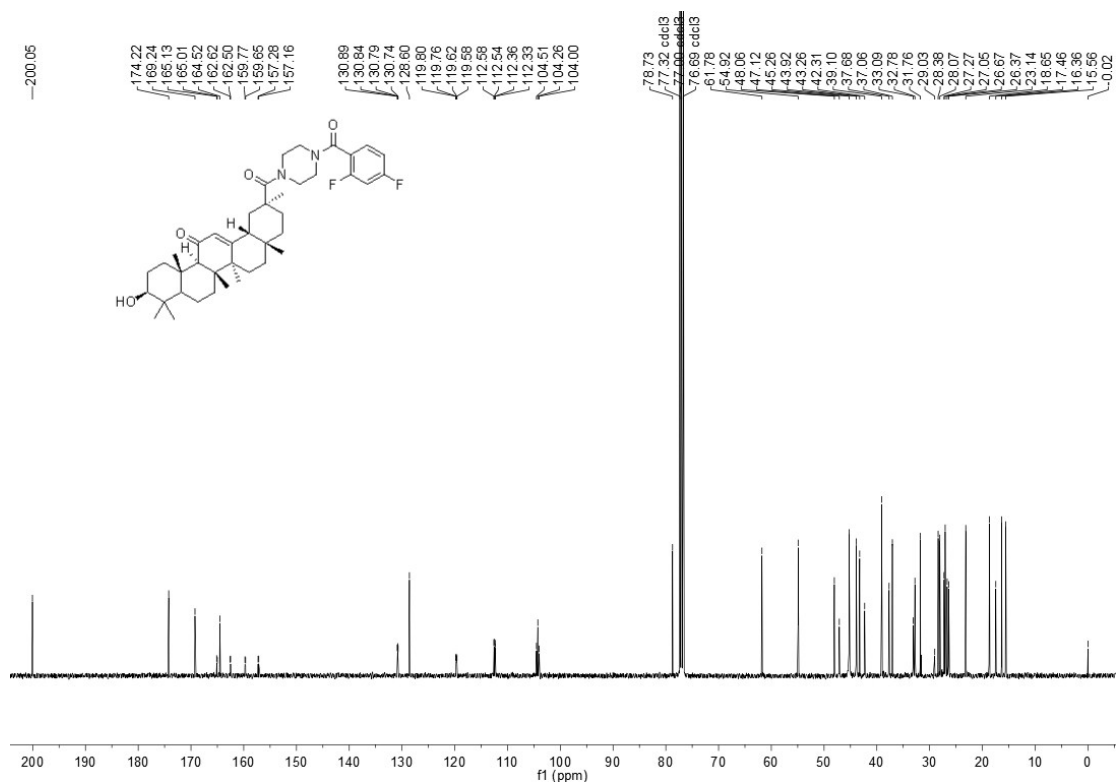



3 $\beta$ -Hydroxy-30-(4-(3,5-difluorobenzoyl)-1-piperazinyl)-olean-12-ene-11,30-dione (**4n**)

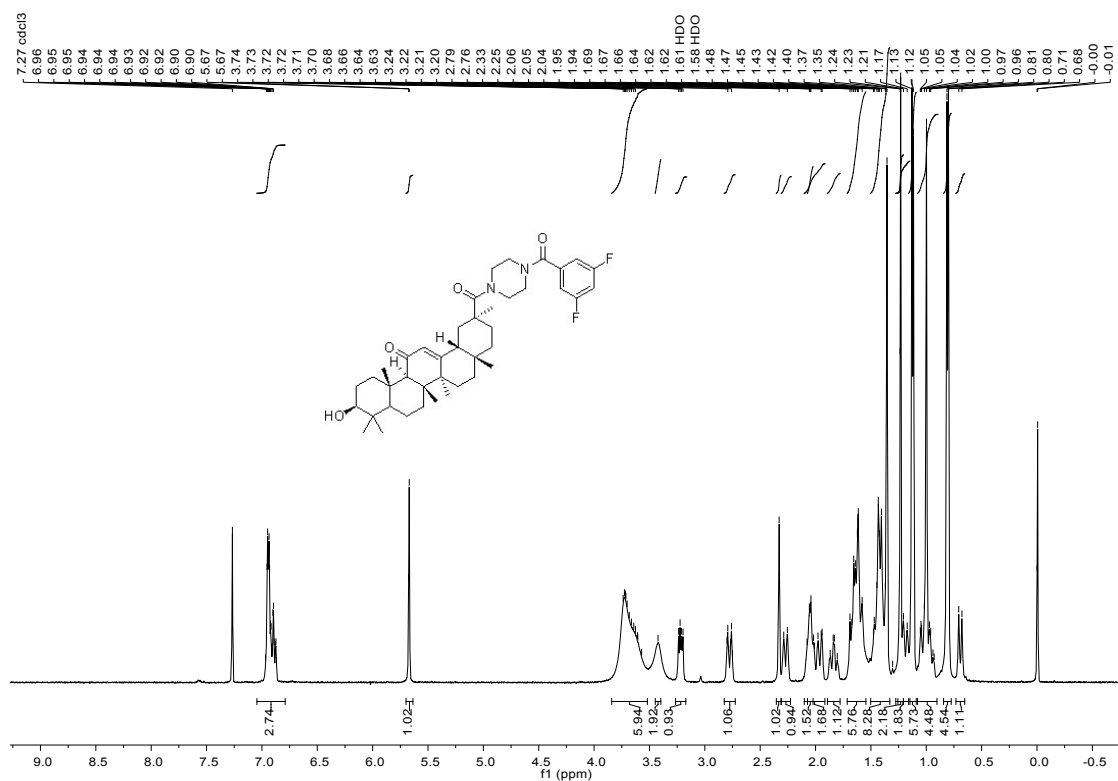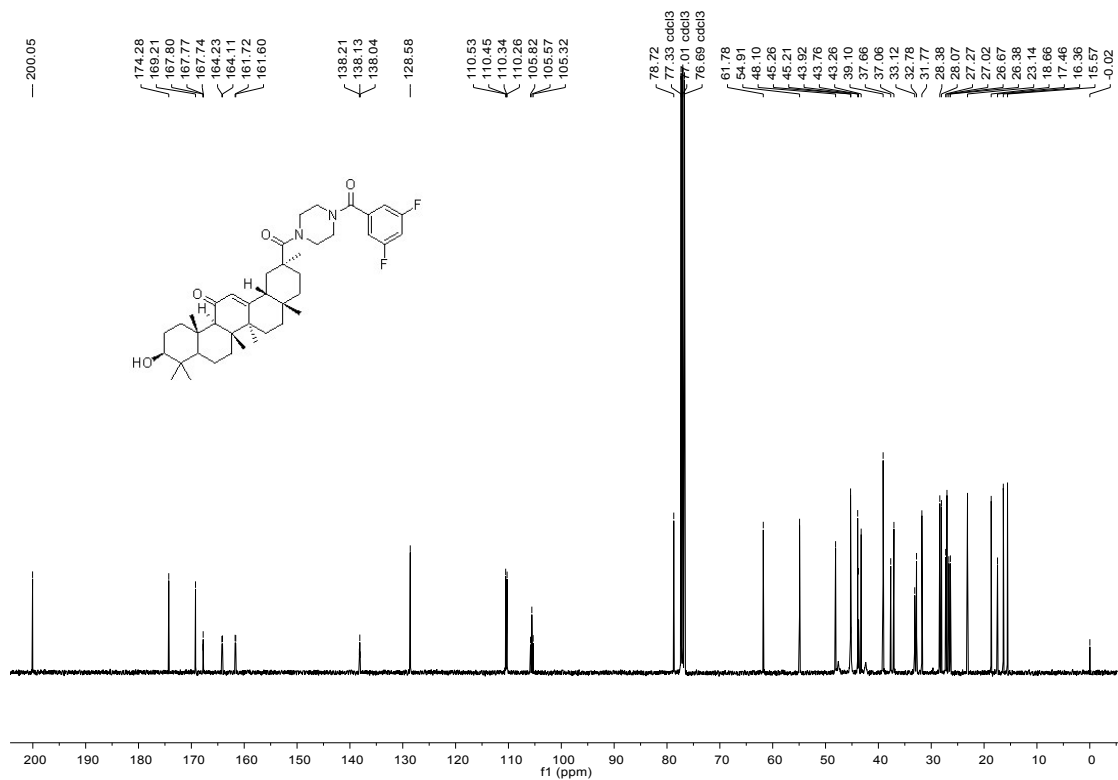

3 $\beta$ -Hydroxy-30-(4-(3-(trifluoromethyl)benzoyl)-1-piperazinyl)-olean-12-ene-11,30-dione (**4o**)

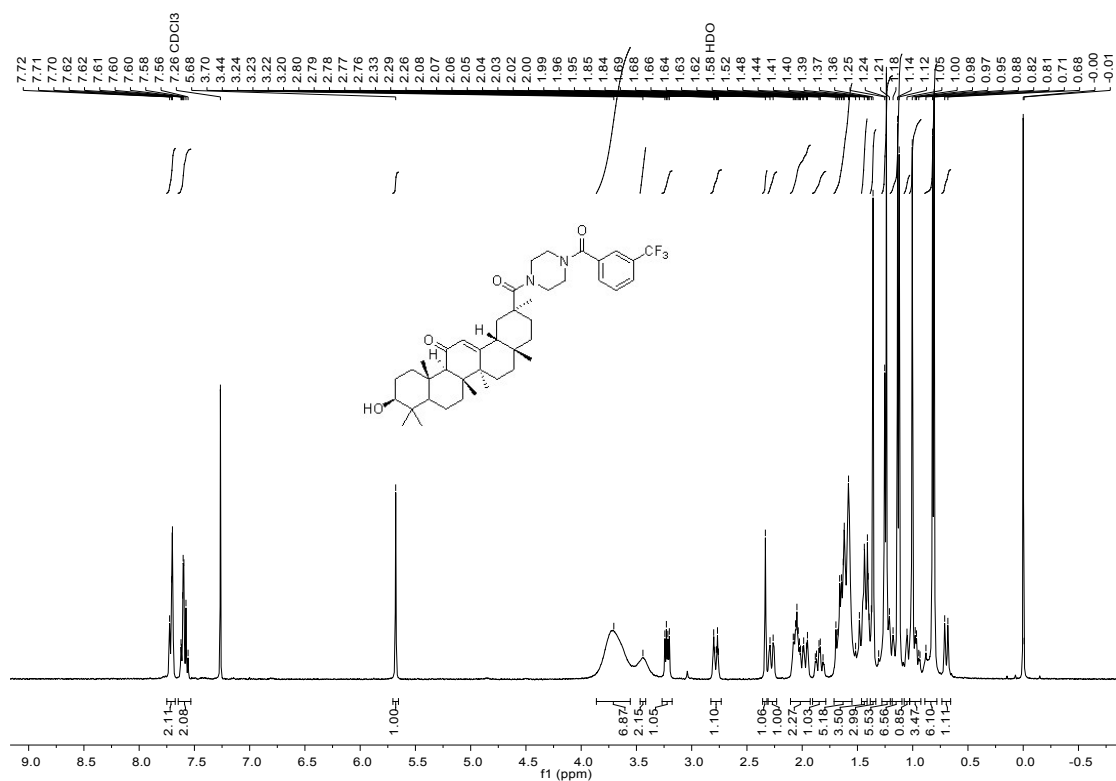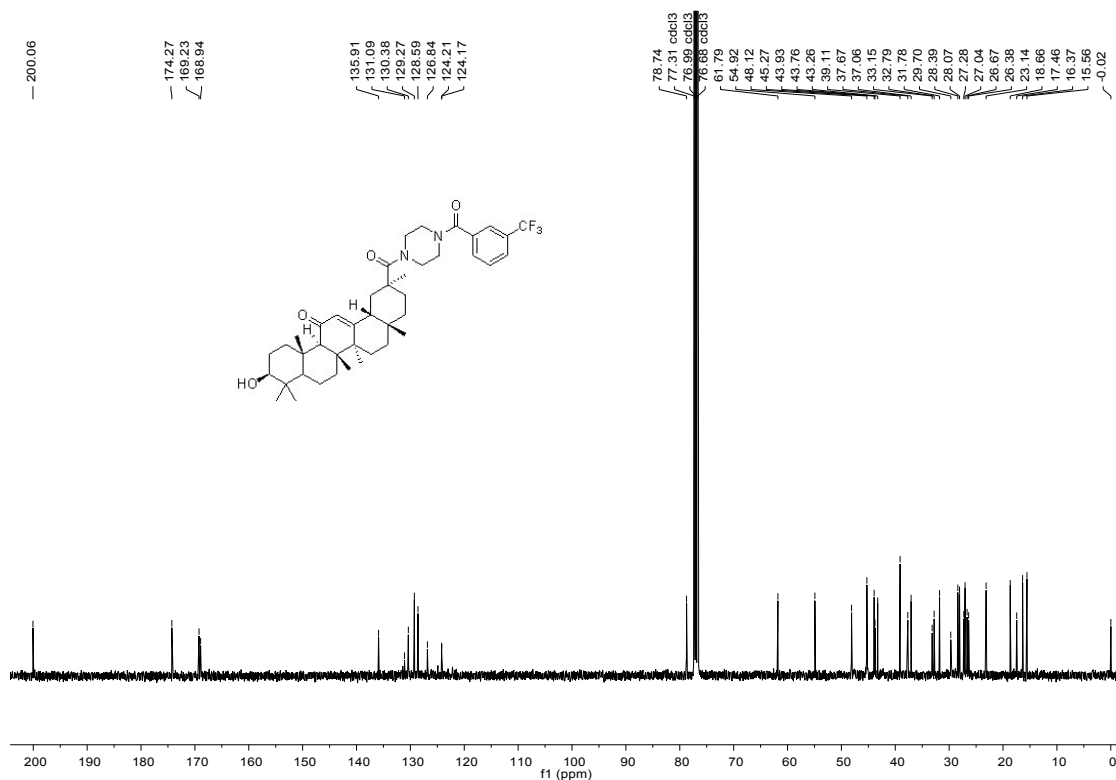

3 $\beta$ -Hydroxy-3 $\alpha$ -(4-(4-(trifluoromethyl)benzoyl)-1-piperazinyl)-olean-12-ene-11,30-dione (**4p**)

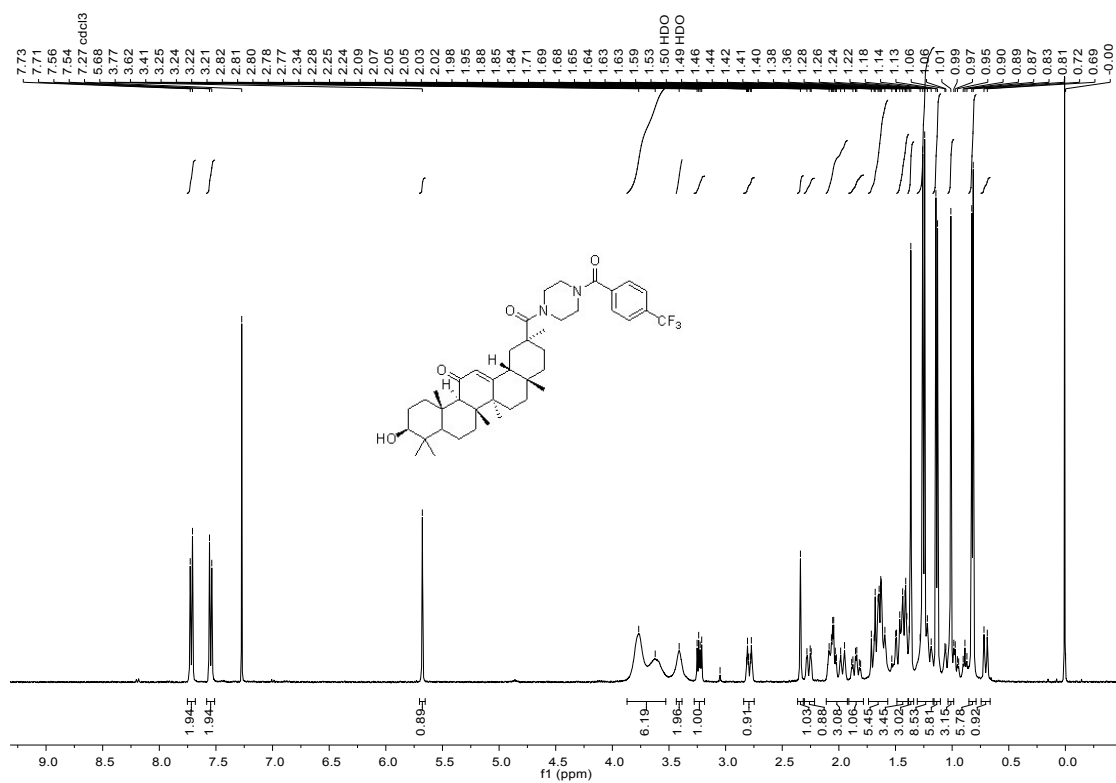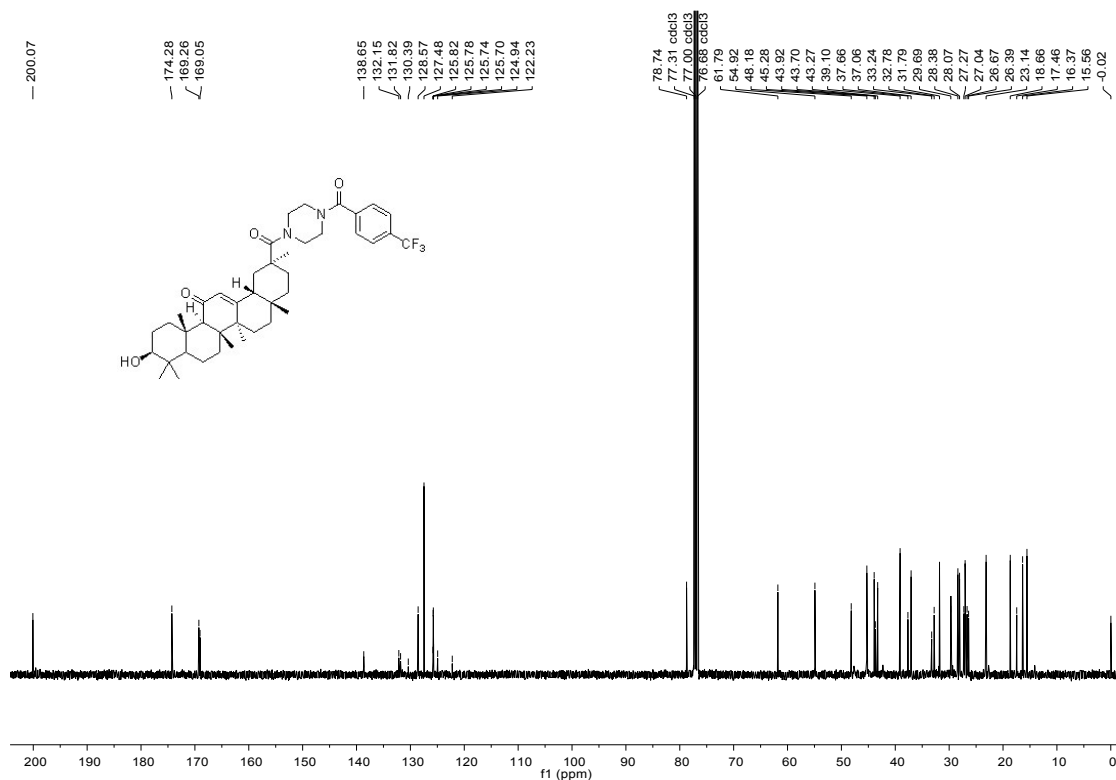

3 $\beta$ -Hydroxy-30-(4-(4-cyanobenzoyl)-1-piperazinyl)-olean-12-ene-11,30-dione (4q)

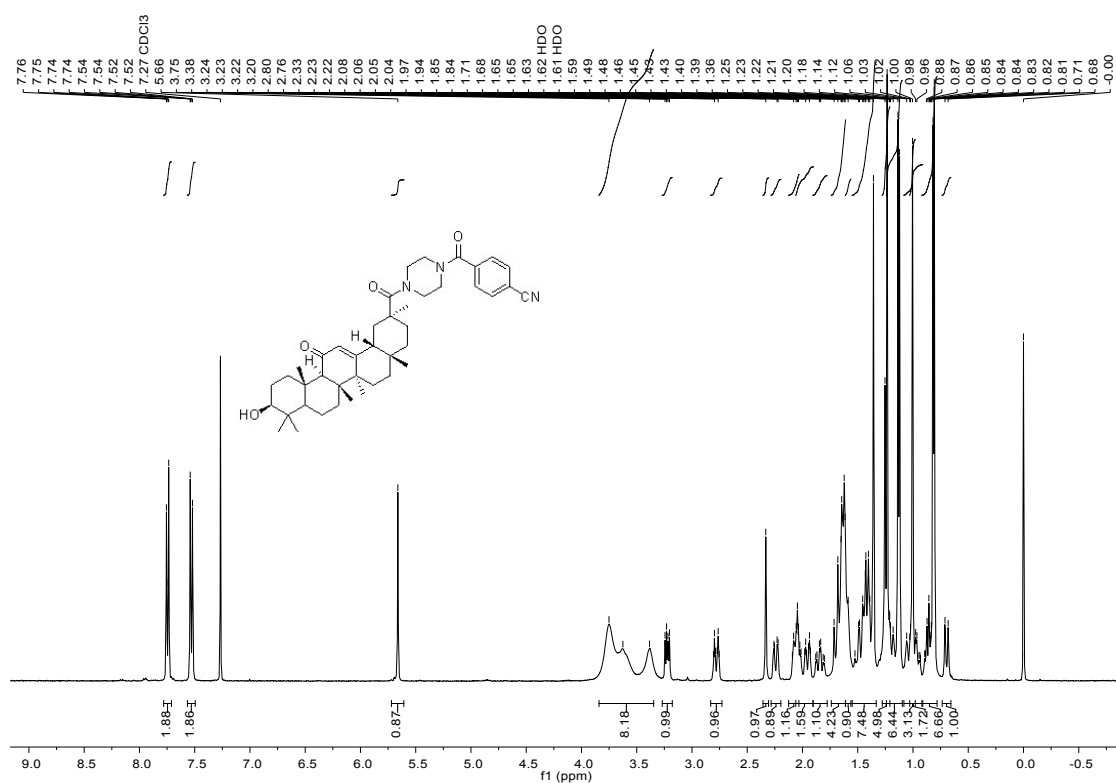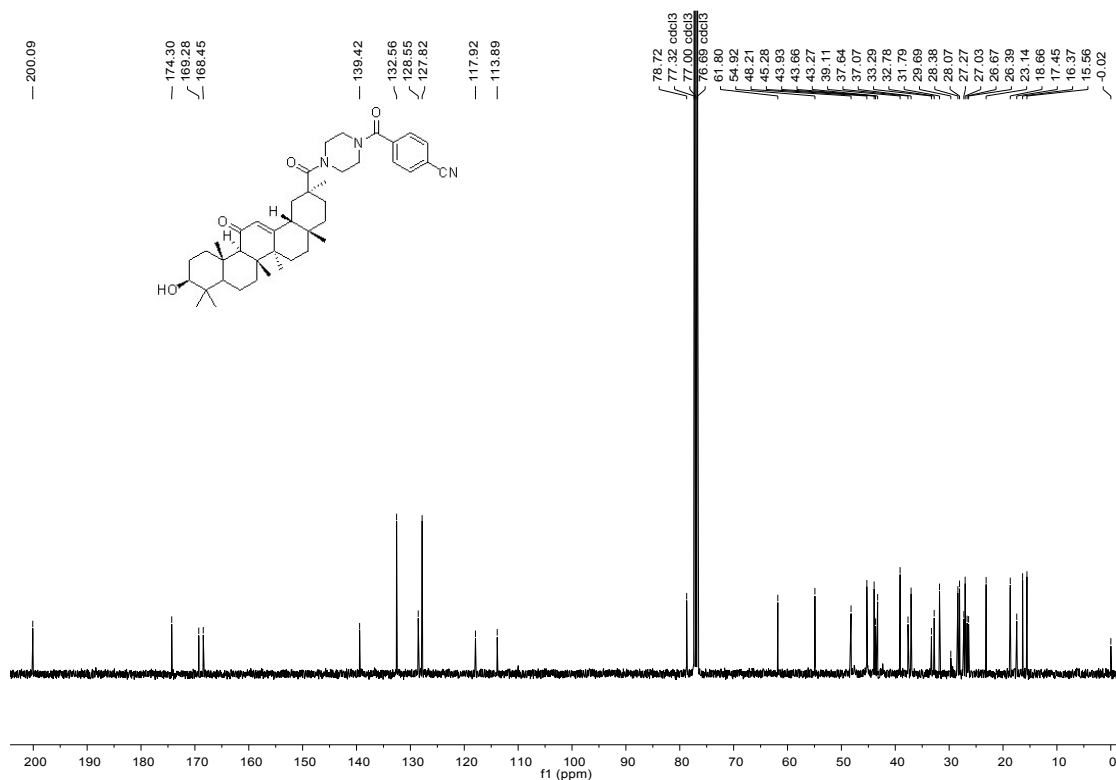

3 $\beta$ -Hydroxy-30-(4-cyclohexanecarbonyl-1-piperazinyl)-olean-12-ene-11,30-dione (**4r**)

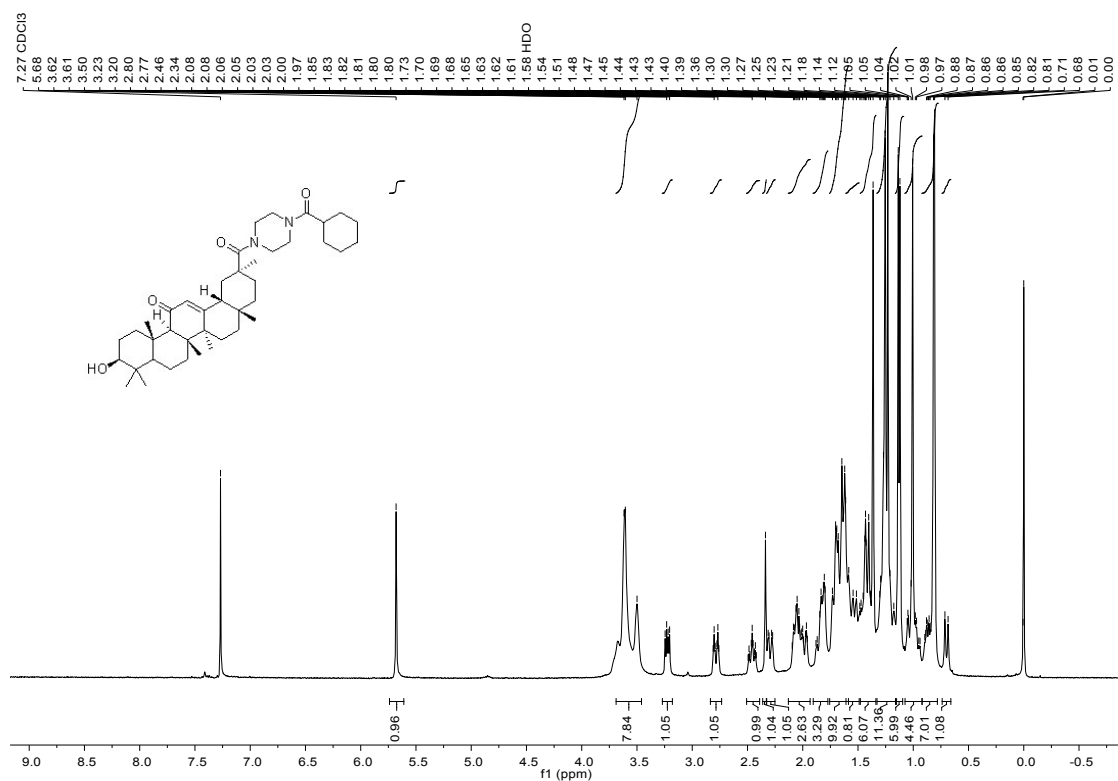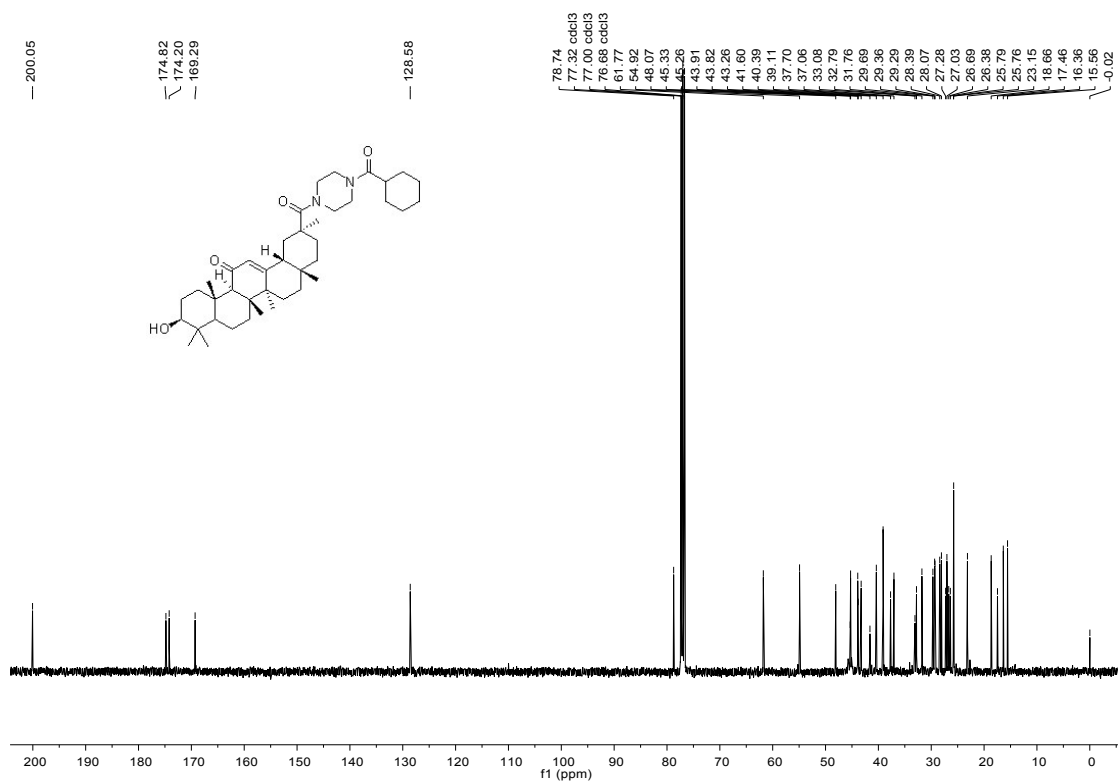

3 $\beta$ -Hydroxy-30-(4-cyclopropanecarbonyl-1-piperazinyl)-olean-12-ene-11,30-dione (**4s**)

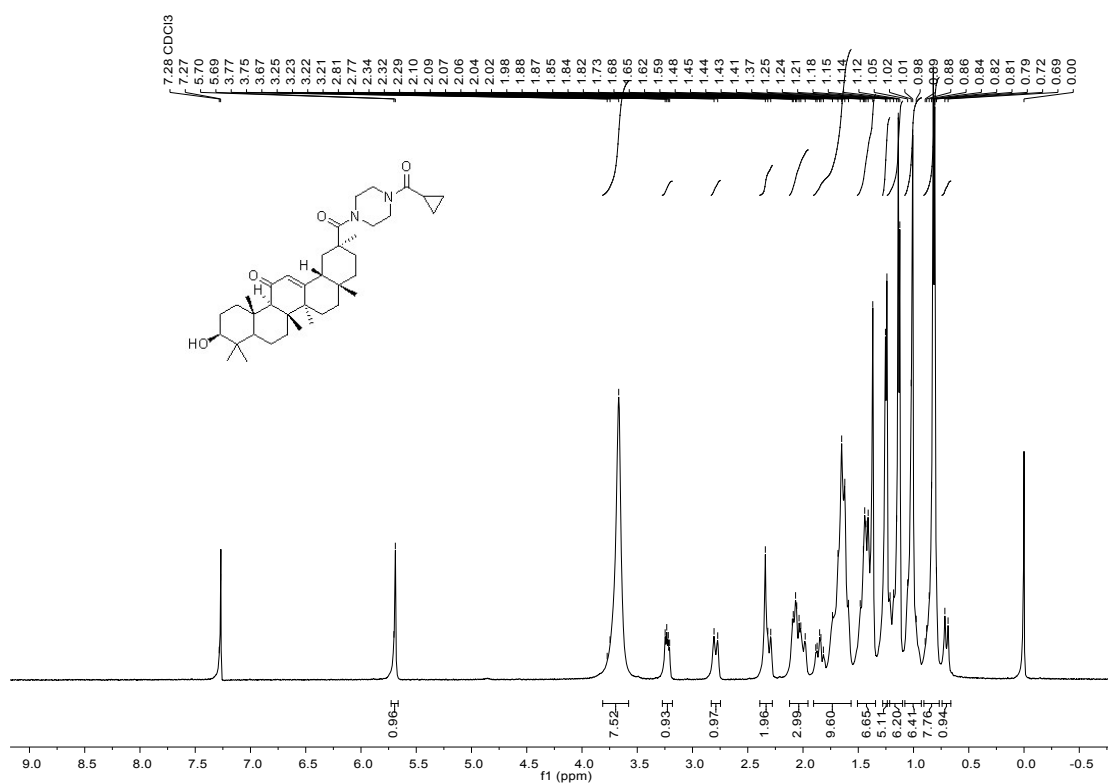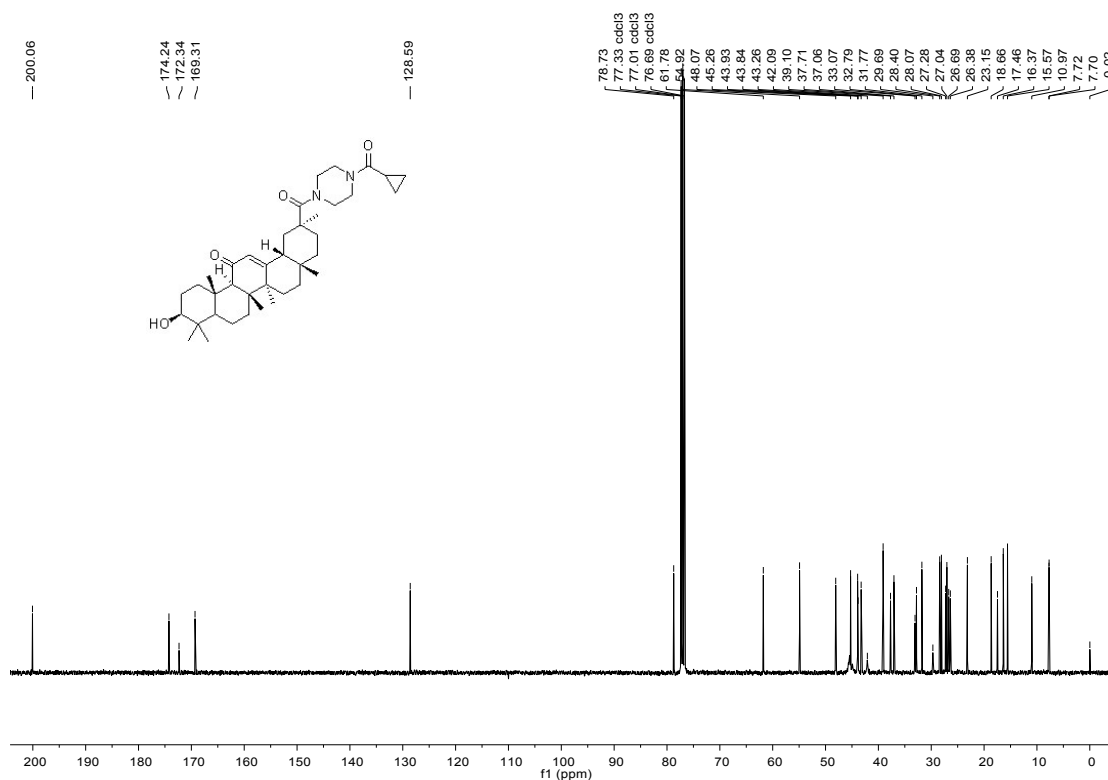

3 $\beta$ -Hydroxy-30-(4-(6-chloronicotinoyl)-1-piperazinyl)-olean-12-ene-11,30-dione (**4t**)

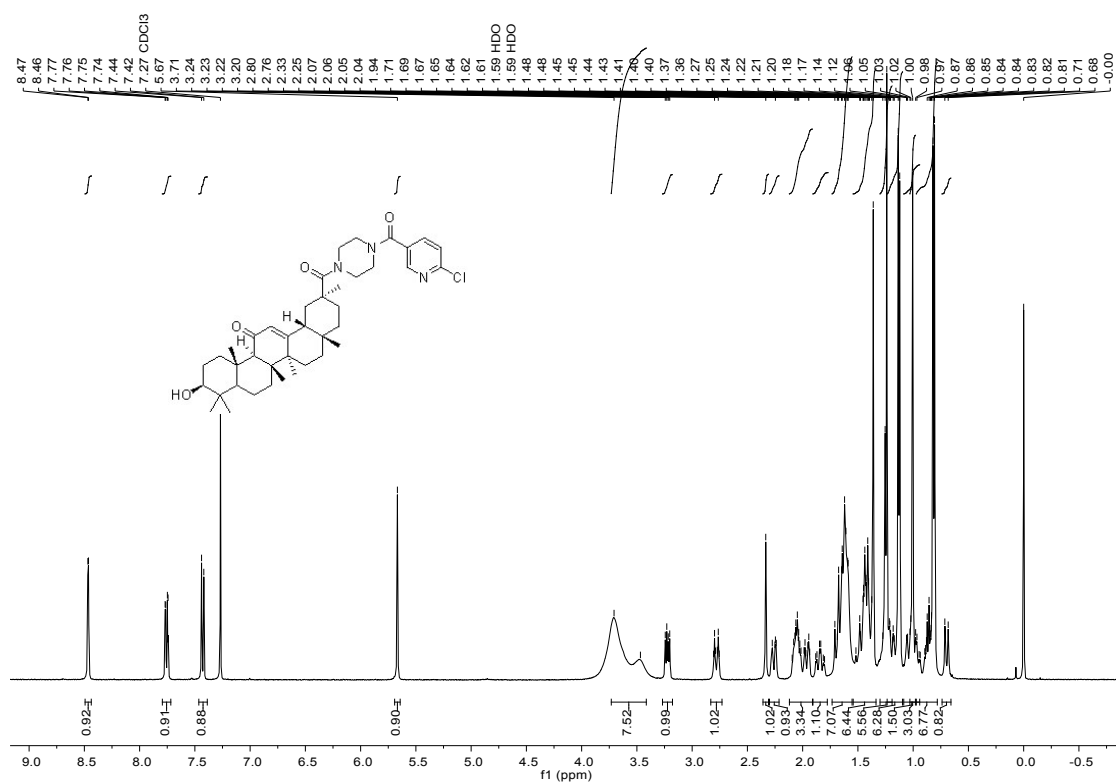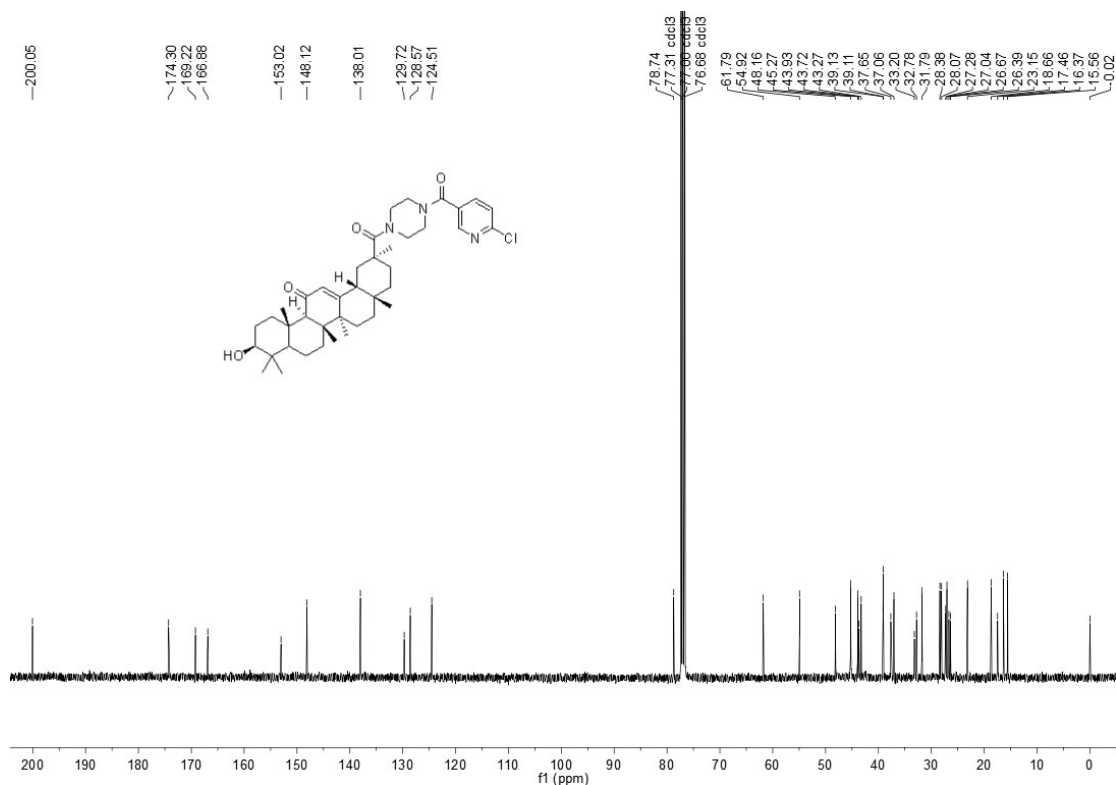

3 $\beta$ -Hydroxy-30-(4-(2-(thiophen-2-yl)acetyl)-1-piperazinyl)-olean-12-ene-11,30-dione (**4u**)

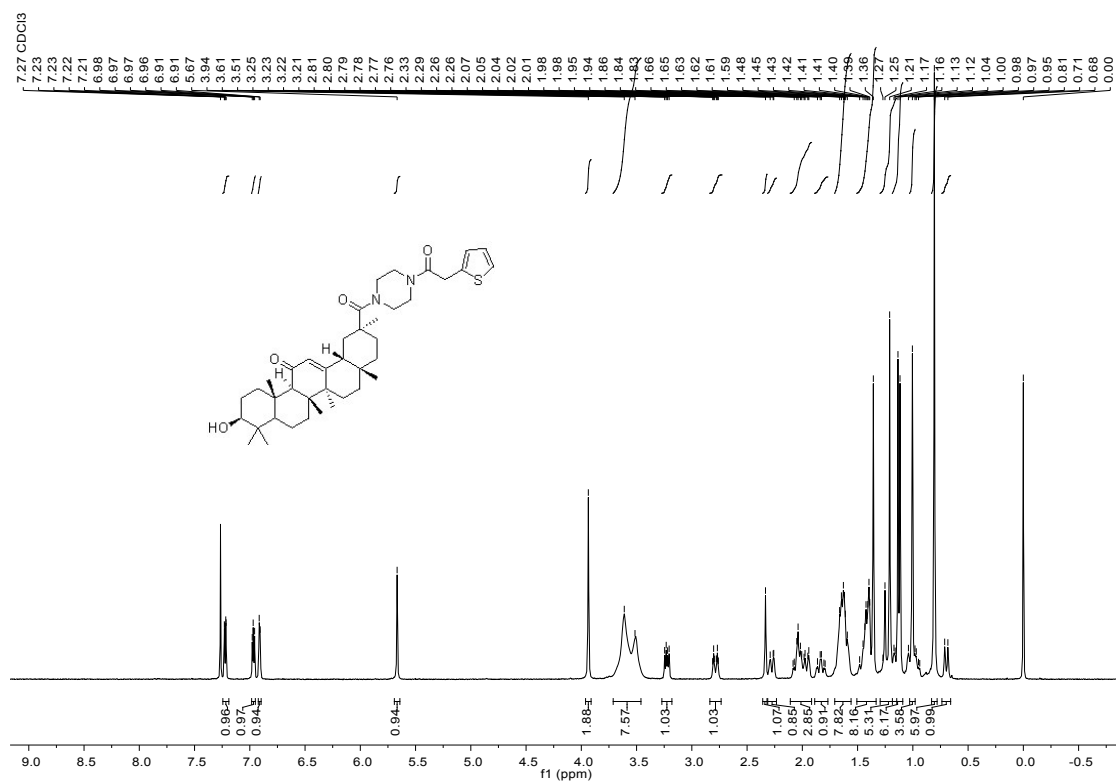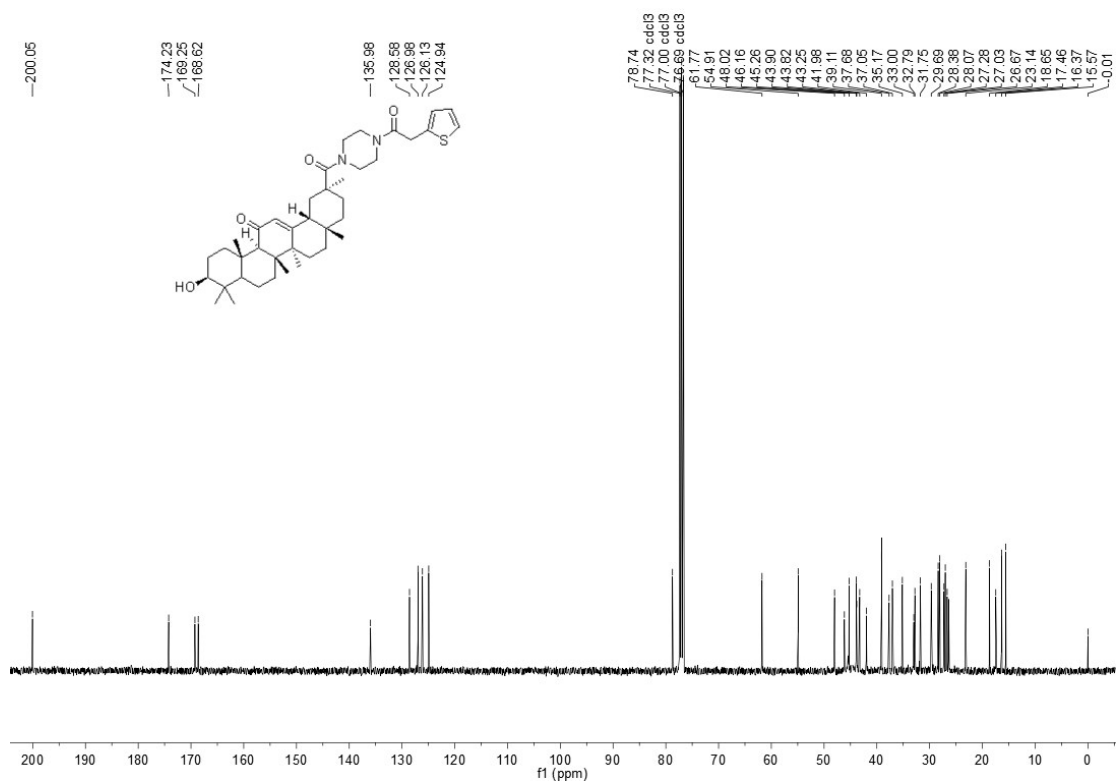



3 $\beta$ -Hydroxy-30-(4-(2-(4-fluorophenyl)acetyl)-1-piperazinyl)-olean-12-ene-11,30-dione (**4v**)

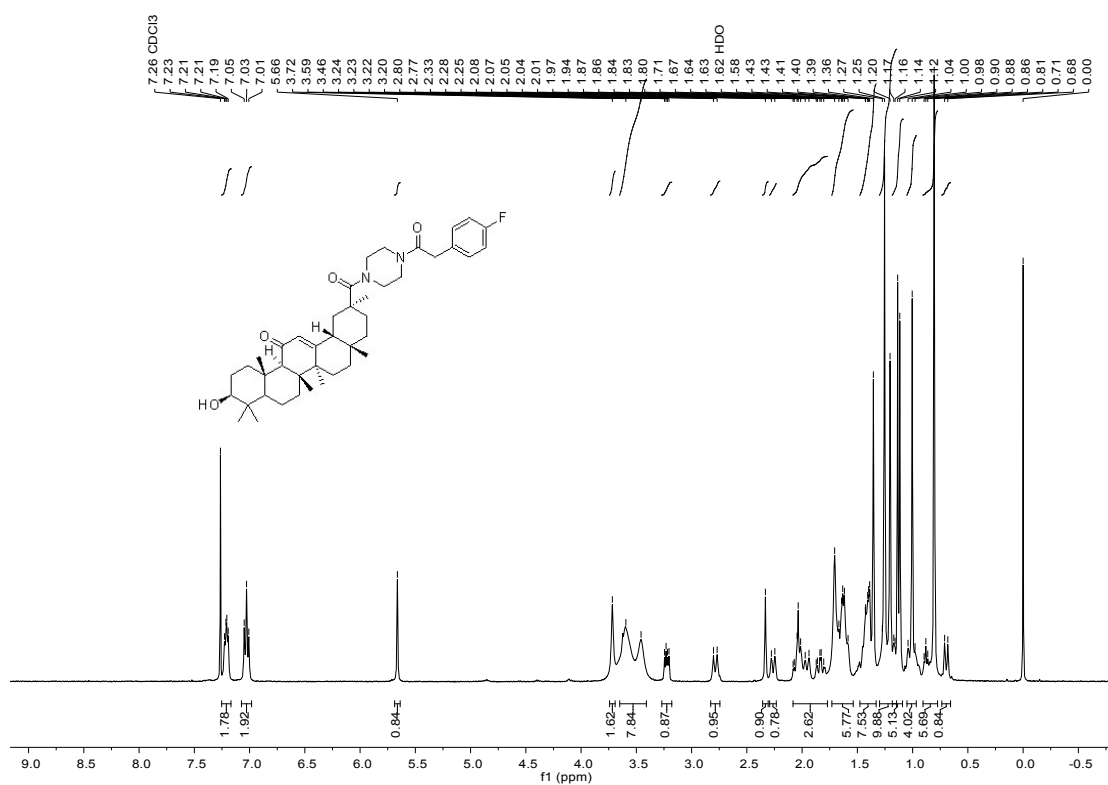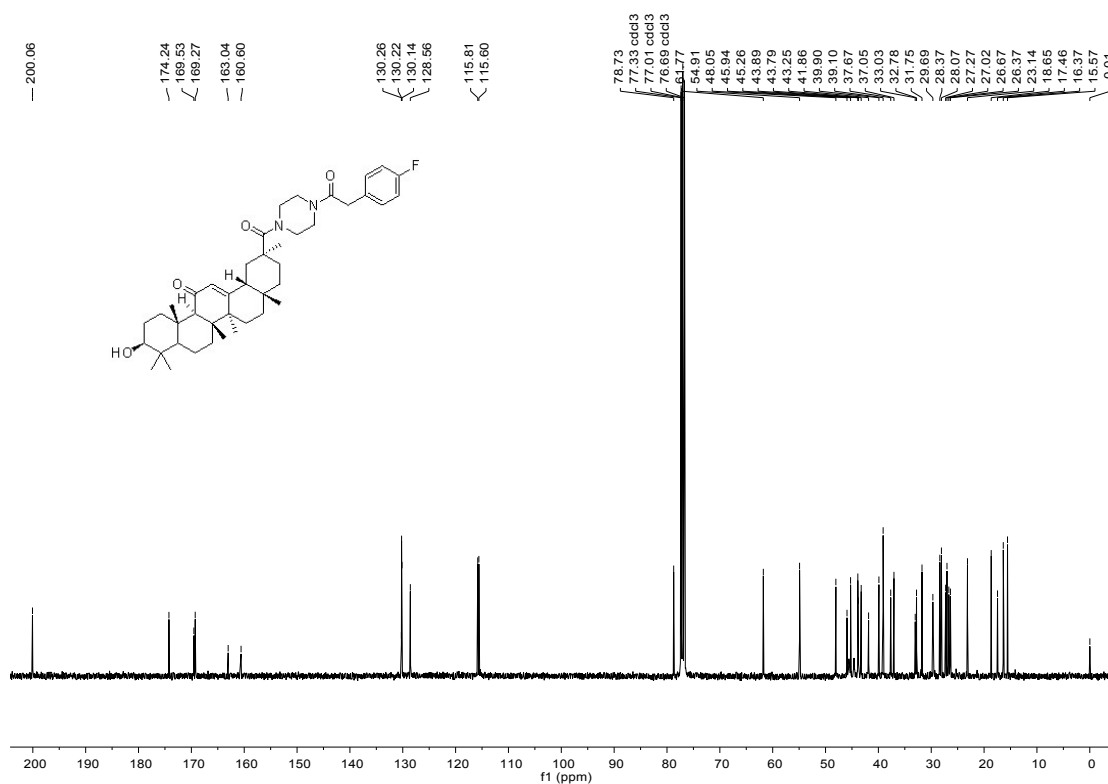

3 $\beta$ -Hydroxy-30-(4-(2-(4-chlorophenyl)acetyl)-1-piperazinyl)-olean-12-ene-11,30-dione (**4w**)

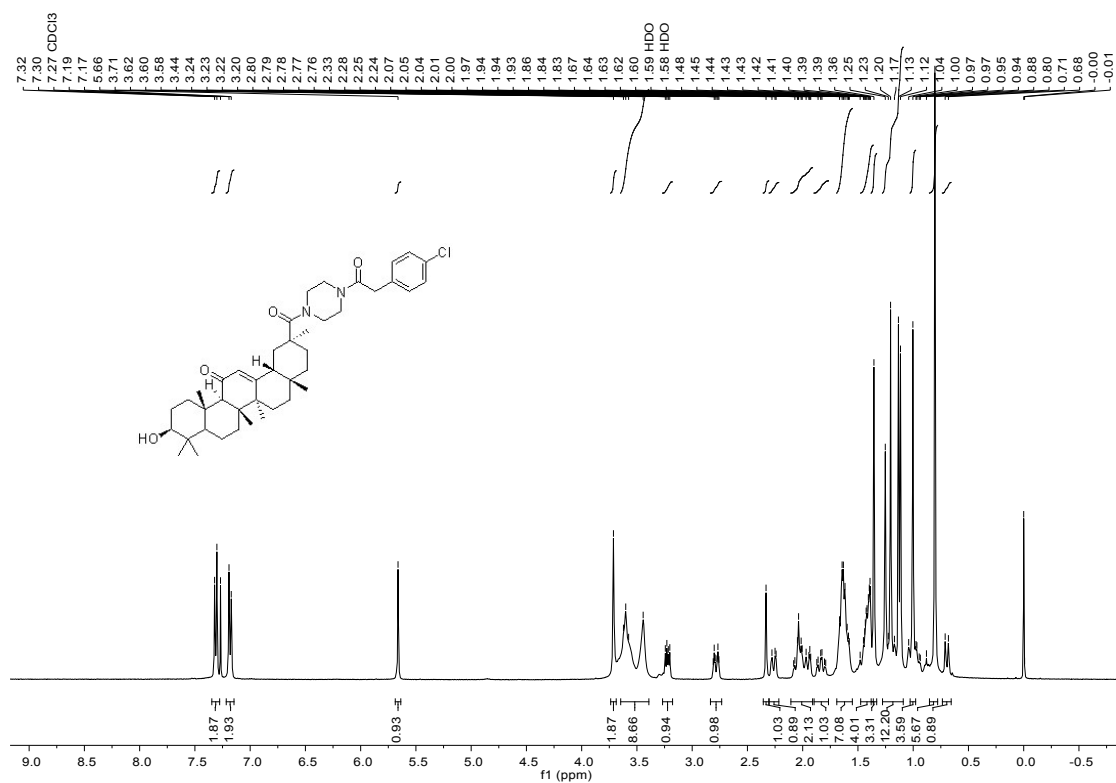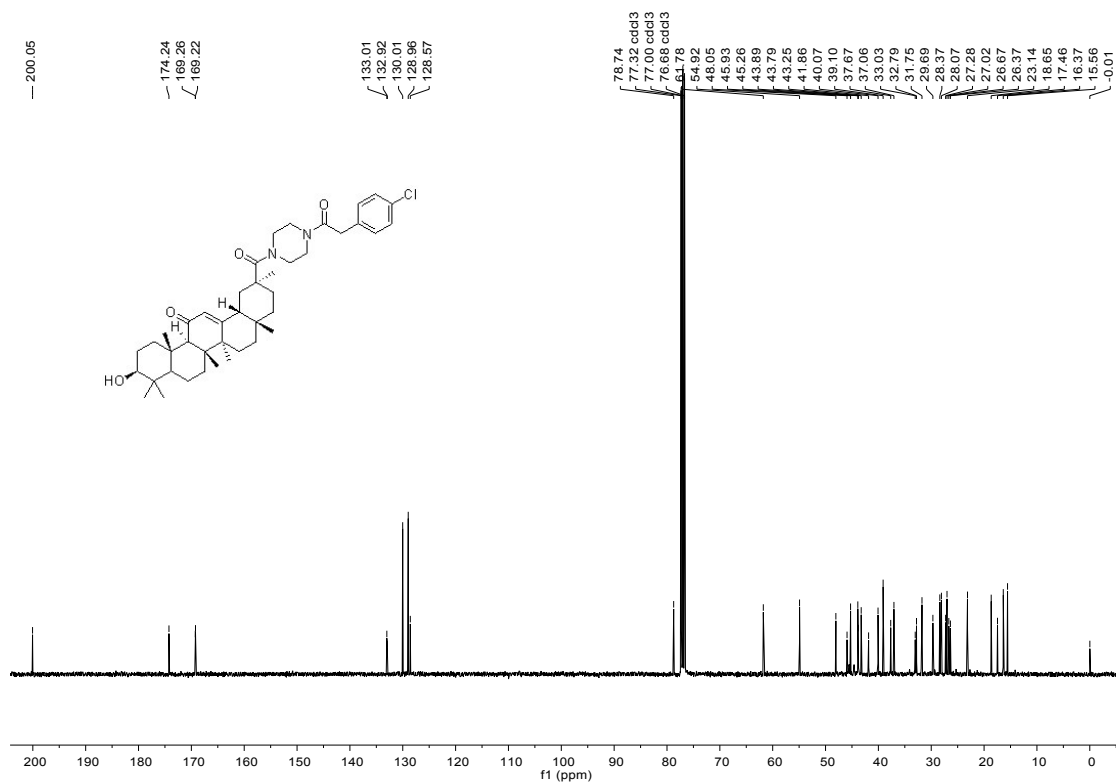

3 $\beta$ -Hydroxy-30-(4-(morpholine-4-carbonyl)-1-piperazinyl)-olean-12-ene-11,30-dione (**4x**)

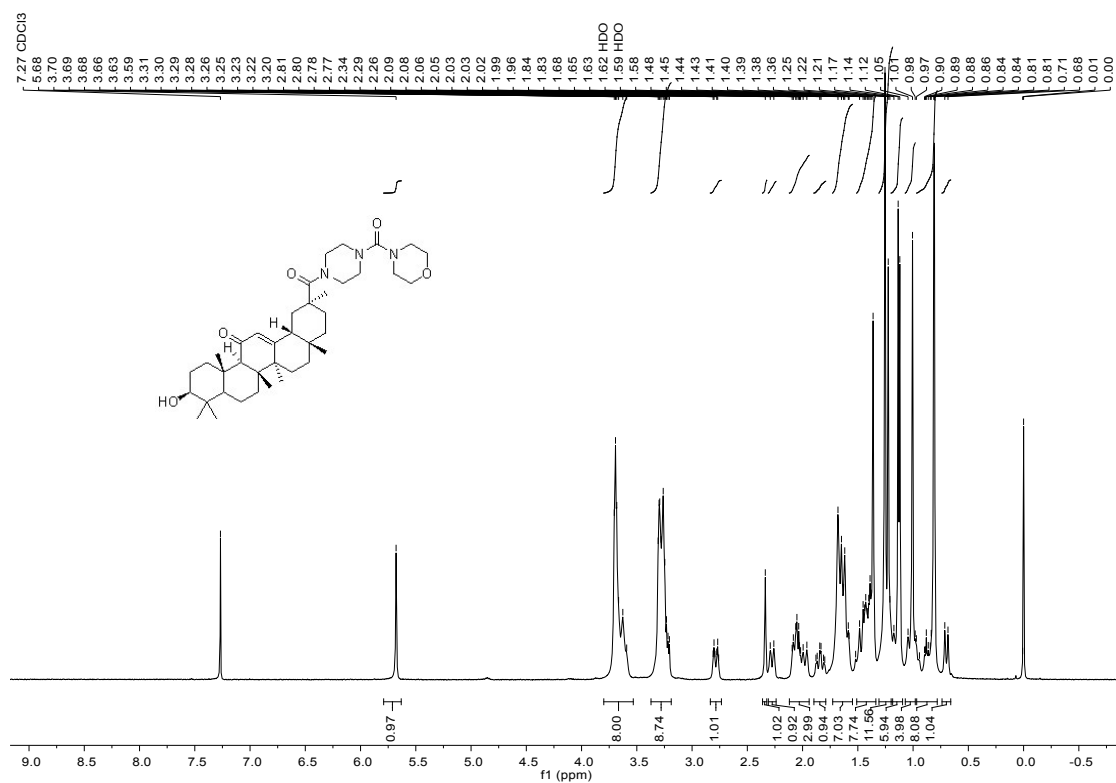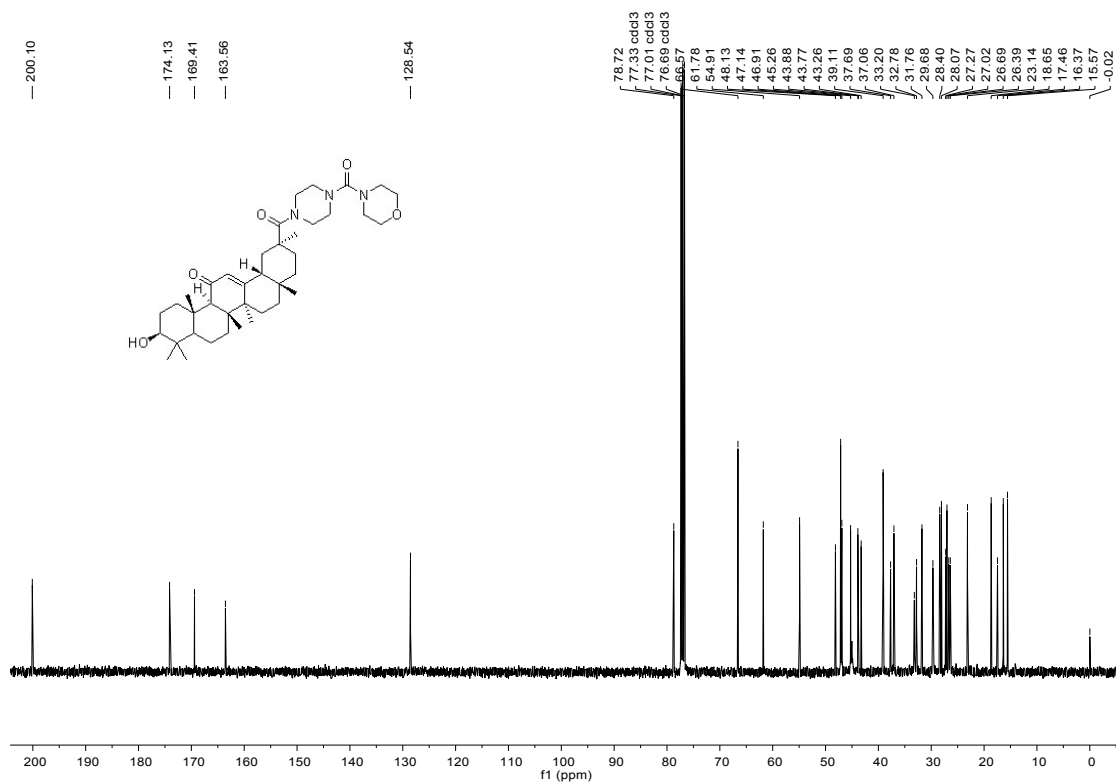

**$\beta$ -Hydroxy-30-(4-(2-methoxyacetyl)-1-piperazinyl)-olean-12-ene-11,30-dione (**4y**)**

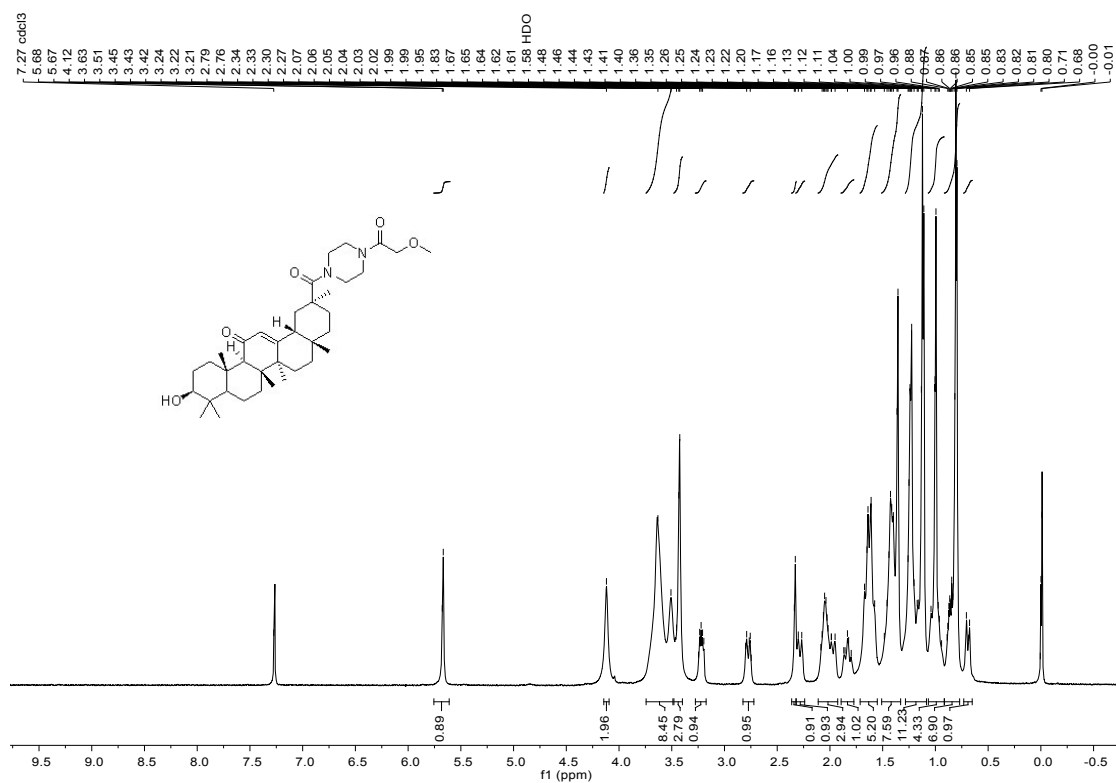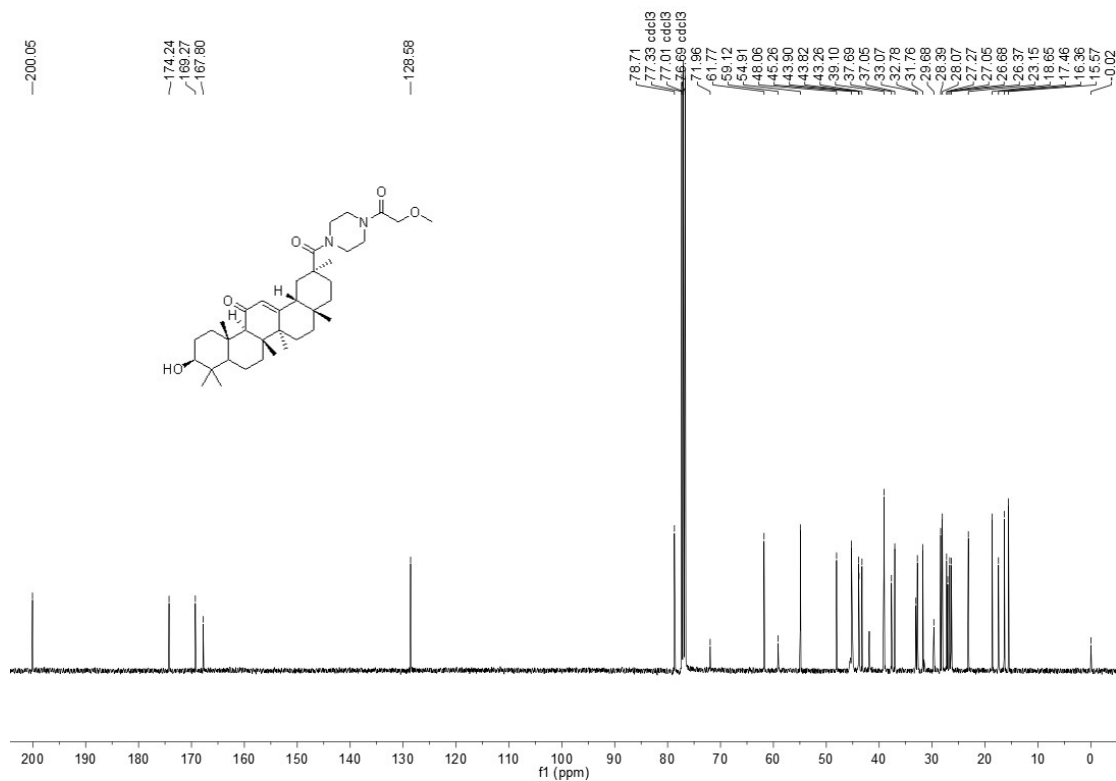

bisamide (5)

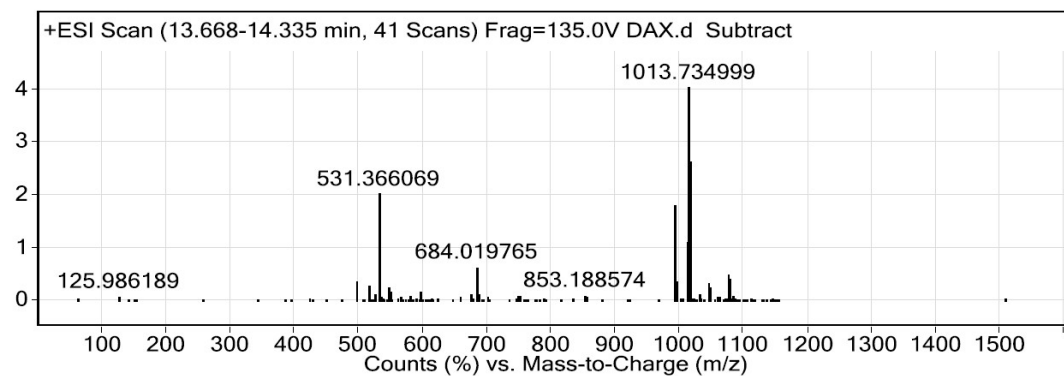

Compound (7)

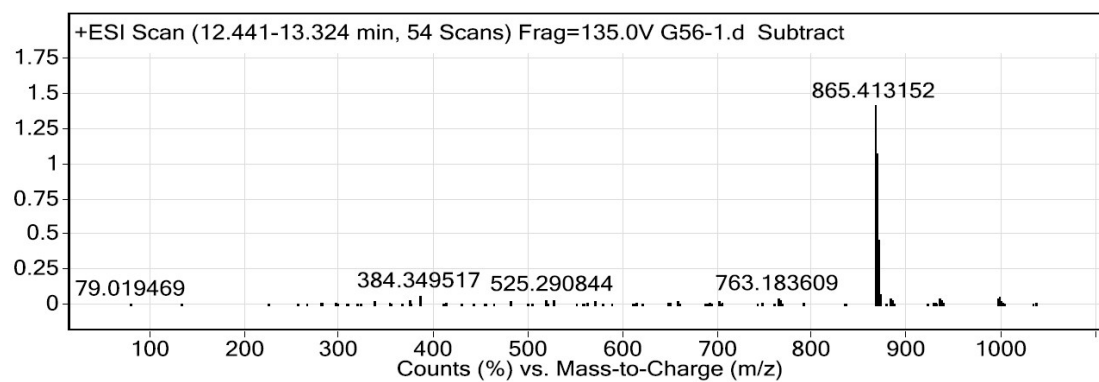

Supplement: d0ra00681e1.pdf [file d0ra00681e1.pdf]
